# Supplementary material for: Immunity and other defenses in pea aphids, Acyrthosiphon pisum
Source: PubMed Central journal article supplement (PMC2872881; doi:10.1186/gb-2010-11-2-r21), 2010-02-23

## **Additional file 1**

### ***Supplemental Material: Immunity and defense in pea aphids, Acyrthosiphon pisum***

#### **Supplementary Methods for Gene Expression Study**

**Gene expression overview.** We utilized real-time quantitative PCR to conduct a preliminary investigation of the expression of 23 recognition, signaling and response genes in aphids subjected to a number of infection and stress treatments (Tables S2, below). First, we verified expression of the immune and stress genes in aphids stabbed with needles inoculated with the natural commensal *Escherichia coli*, a natural Gram-positive bacterial pathogen, a natural Gram-negative bacterial pathogen, or with no needle (control). More closely mimicking the uptake of bacteria while feeding, we verified expression of the genes in aphids fed on artificial diet containing either *E. coli* or a Gram-negative pathogen relative to that of aphids fed on control diet with no bacteria. We also verified gene expression in entomopathogen fungus-infected to uninfected aphids, and in aphids stabbed with pathogenic virus-inoculated needles to unstabbed control aphids. All microbes used have been isolated from pea aphids in natural populations. Finally, to assess effects of environmental stress, we verified gene expression in aphids exposed to alarm pheromones, starvation, and heat-shock.

We conducted the five challenge experiments with aphids of clonal line LSR1, the clone sequenced in the genome sequencing project. This line was cured of its secondary symbiont, *R. insecticola*, more than two years ago using a standard antibiotic treatment [132], and has been continuously maintained as an asexual clone on fava beans at 16hr

light: 8hr dark at 20°C. For each experiment, we used 5-6 day old, unwinged aphids, which were maintained on fava bean plants at 20°C unless otherwise noted.

**Bacterial stabbing experiment.** For the first experiment, we stabbed aphids with *E. coli*, Gram-negative pathogen Ng5B, in the genus *Enterobacter*, or Gram-positive pathogen 6B, in the genus *Staphylococcus*. *E. coli* has been previously shown to be a commensal that has little affect on aphid survival when either injected into or fed to aphids (Figure S3, below) [133]. Ng5b and 6b are bacteria originally isolated from laboratory pea aphids. When fed to aphids, these pathogens kill most aphids in approximately 48 hours (Figure S3a, below). The night before the infection, we grew bacterial cultures from glycerol stocks on Luria broth (LB) agar at 37°C. The morning of the infection, we transferred bacterial colonies to LB and grew them at 37°C. We determined concentration of broth cultures by optical density (OD<sub>600</sub>), and then standardized the cultures to OD<sub>600</sub> = 0.5. Next, we stabbed aphids with a minuten pin contaminated with the standardized bacterial cultures or with sterile LB and then transferred the stabbed aphids and unstabbed control aphids to fava bean plants. After eight hours, we froze five aphids per condition in liquid nitrogen and stored them at -80°C for subsequent RNA extraction. We monitored ten aphids per condition for survival (Figure S3, below).

**Bacterial feeding experiment.** For the second experiment, we fed aphids on AP3 artificial *A. pisum* diet [134] containing no bacteria (control), *E. coli*, or the Gram-negative pathogen Ng5b. We grew bacteria as above and then inoculated the treatment diets with 1 µL bacterial culture per 20 mL diet, and control diet with the same amount of bacteria-free LB. We plated the diets onto LB agar to confirm that the control diet was

free of bacteria and that the final bacterial concentration in the treatment diet was approximately  $2 \times 10^4$  colony forming units (cfu) per mL. We added one drop of food-grade blue dye per 5 mL of diet to allow us to detect whether aphids had ingested the diet. We then filled 10 mm Petri dish bottoms with diet (either control or treatment) and covered the dish with stretched Parafilm. We affixed the feeding dishes to the bottom of 15 mm Petri dishes, and transferred 30 - 50 aphids directly from plants to each feeding dish. We maintained dishes upside down in a 20°C incubator. Approximately 12 hours after being exposed to the diet, we froze five aphids from each treatment that had fed (as determined by the presence of dye in the aphid intestinal tract) in liquid nitrogen and maintained them at -80°C for subsequent RNA extraction. Eight hours later, we transferred the remaining aphids that had fed (n = 30 per treatment) to fava bean plants and monitored them for survival (Figure S3a, below).

**Fungal shower experiment.** For the third experiment, we exposed aphids to a shower of spores of the fungus *Zoophthora occidentalis*, an aphid specific fungal entomopathogen [135]. We placed aphids in a 70 mm tall cylinder with a damp sponge at the bottom. We then inverted an approximately two-week-old culture of *Z. occidentalis* on potato dextrose agar (PDA) over the cylinder and allowed the spores to fall on the aphids for 2 hours. Control aphids were exposed to the same conditions but with a sterile PDA plate. After exposure, we transferred the aphids to fava plants. We froze five aphids per condition in liquid nitrogen 24 hours after exposure and monitored 22 aphids per condition for survival (Figure S3b, below). The frozen samples were maintained at -80°C for subsequent RNA extraction.

**Viral stabbing experiment.** For the fourth experiment, we stabbed aphids with a solution containing Aphid Lethal Paralysis Virus (ALPV), a RNA virus found in natural populations that is lethal to pea aphids (Georgievska, Miller & Bonning, unpublished data) [136, 137]. The solution was made by grinding up virus-killed aphid cadavers in 7.5  $\mu\text{L}$  of water per cadaver. After stabbing, aphids were isolated for an hour and then kept on fava bean plants until 16 hours from initial stabbing, when five aphids per condition were removed from the plants, frozen in liquid nitrogen, and stored at  $-80^{\circ}\text{C}$  prior to RNA extraction. Unstabbed control aphids, raised and treated under similar conditions, were frozen as well. In addition, 20 stabbed and 20 unstabbed aphids were monitored over a period of 96 hours for survival (Figure S3c, below). Though it is possible that responses to stabs with the virus-slurry would be a result of exposure to other pathogens in the ground-up cadaver, stabs with slurry from non-virus killed aphid cadavers do not lead to a significant increase in mortality (Parker, unpublished data), and thus we expect that responses can be largely attributed to virus exposure.

**Stress experiment.** For the fifth experiment, we exposed aphids to a number of stressors. We exposed one group of aphids on plants to 3  $\mu\text{L}$  of (*E*)- $\beta$  farnesene (EBF) (1  $\mu\text{g}/\mu\text{L}$  in hexane), which we placed on a small piece of filter paper near the base of each plant. We enclosed the plants under a plastic cover with no ventilation. Within minutes of exposure, we froze five EBF-exposed aphids, and five control, unexposed aphids. Twelve hours later, we froze another five aphids that had been exposed to EBF. We heat shocked a second group of aphids following standard procedures [138]. After two hours at  $36^{\circ}\text{C}$ , we froze five heat-shocked aphids and then maintained another five heat-shocked aphids at  $20^{\circ}\text{C}$  for another eight hours prior to freezing. To assess the affects of starvation, we

placed a third batch of aphids into sterile Petri dishes with moistened filter paper for 12 hours prior to freezing.

**Quantitative PCR.** For each sample, we extracted RNA from five whole aphids using a Qiagen RNA easy tissue kit and prepared cDNA from each sample using a Qiagen Quantitect reverse transcription kit. We carried out expression studies, utilizing the delta-delta CT method, on an Applied Biosystems Step One Plus machine. Each reaction contained 10  $\mu$ L AB Power SYBR PCR master mix, 300 nM of each primer, approximately 100 ng cDNA, and water to a total volume of 20  $\mu$ L. We designed primers utilizing Primer3 [139] or Primer Express (Applied Biosystems) to amplify approximately 100 bps of the gene of interest (Table S3, below). Primers spanned an exon-exon boundary where possible. For each sample, we carried out three separate reactions for each primer pair, and averaged the comparative threshold cycle (Ct) among the three values. We standardized all Ct values for the gene of interest relative to the Ct values for the endogenous control gene actin, yielding the delta Ct value. We then standardized relative to the appropriate control, yielding the delta-delta Ct value. Finally, these delta-delta Ct values were standardized such that each control treatment average was one, yielding the relative quantity (RQ) values, to allow for comparison with studies reporting fold-changes.

**Table S1. Pea aphid immune and stress gene list.** Genes are listed in the approximate order to which they are mentioned in the text. The last column indicates results of a tblastn search (contig ID and e-value) of all identified pea aphid genes against an EST sequence database for *Myzus persicae*, the green peach aphid. All pea aphid sequences are accessible at AphidBase Gbrowse [140]. All green peach aphid sequences can be downloaded at AphidBase Downloads (files Myzus454 and MyzusSanger) [141].

| Class       | Role in Insect Immunity                           | Gene Symbol | Gene Name                            | Other Gene Names                   | ACYPI identifier | NCBI gene ID | NCBI transcript ID | NCBI protein ID | Myzus ID (e-value) |
|-------------|---------------------------------------------------|-------------|--------------------------------------|------------------------------------|------------------|--------------|--------------------|-----------------|--------------------|
| recognition | bacterial recognition                             | PGRP        | Peptidoglycan recognition protein    |                                    | not found        | not found    | not found          | not found       | n/a                |
| recognition | bacterial and fungal pattern recognition          | GNBP1       | Gram Negative Binding Protein 1      |                                    | ACYPI005376      | 100164352    | XM_001944438.1     | XP_001944473.1  | 6372 (7e-134)      |
| recognition | bacterial and fungal pattern recognition          | GNBP2       | Gram Negative Binding Protein 2      |                                    | ACYPI006143      | 100165182    | XM_001947795.1     | XP_001947830.1  | 3883 (4e-178)      |
| recognition | bacterial recognition, induction of phenoloxidase | Ctl1        | C-type Lectin 1                      |                                    | ACYPI004676      | 100163601    | XM_001944997.1     | XP_001945032.1  | 26603 (3e-39)      |
| recognition | bacterial recognition, induction of phenoloxidase | Ctl2        | C-type Lectin 2                      |                                    | ACYPI005998      | 100165024    | XM_001946121.1     | XP_001946156.1  | 26603 (3e-38)      |
| recognition | bacterial recognition, induction of phenoloxidase | Ctl3        | C-type Lectin 3                      |                                    | ACYPI004682      | 100163607    | XM_001943575.1     | XP_001943610.1  | 60035 (3e-6)       |
| recognition | bacterial recognition, induction of phenoloxidase | Ctl         | C-type Lectin galactose-binding      |                                    | ACYPI009411      | 100168734    | XM_001951375.1     | XP_001951410.1  | 3644 (3e-130)      |
| recognition | bacterial recognition, induction of phenoloxidase | Ctl         | C-type Lectin selectin-like          |                                    | ACYPI003045      | 100161853    | XM_001942942.1     | XP_001942977.1  | 73637 (1e-31)      |
| recognition | several roles have been hypothesized              | gale1       | galectin 1                           | Galactoside-binding soluble lectin | ACYPI001371      | 100160038    | XM_001943734.1     | XP_001943769.1  | 30445 (2e-6)       |
| recognition | several roles have been hypothesized              | gale2       | galectin 2                           | Galactoside-binding soluble lectin | ACYPI000409      | 100158995    | XM_001947578.1     | XP_001947613.1  | 24692 (8e-32)      |
| recognition | bind to lipoproteins, bacteria                    | sr-CI       | Scavenger receptor class C, type I   |                                    | not found        | not found    | not found          | not found       | n/a                |
| recognition | bind to lipoproteins, bacteria                    | sr-CII      | Scavenger receptor class C, type II  |                                    | not found        | not found    | not found          | not found       | n/a                |
| recognition | bind to lipoproteins, bacteria                    | sr-CIII     | Scavenger receptor class C, type III |                                    | not found        | not found    | not found          | not found       | n/a                |
| recognition | bind to lipoproteins, bacteria                    | sr-CIV      | Scavenger receptor class C, type IV  |                                    | not found        | not found    | not found          | not found       | n/a                |
| recognition | receptor in phagocytosis and microbial binding    | eater       | eater                                |                                    | not found        | not found    | not found          | not found       | n/a                |
| recognition | receptor in phagocytosis and microbial binding    | nim-C1      | nimrod C1                            |                                    | not found        | not found    | not found          | not found       | n/a                |
| signaling   | toll pathway                                      | spz1-1      | spätzle 1Bi                          | spatzle 1b                         | ACYPI004362      | 100163265    | XM_001950373.1     | XP_001950408.1  | 649 (1e-99)        |
| signaling   | toll pathway                                      | spz1-2      | spätzle 1Bii                         | spatzle 1b                         | ACYPI001858      | 100160571    | XM_001947931.1     | XP_001947966.1  | 649 (6e-119)       |
| signaling   | toll pathway                                      | spz1-3      | spätzle 1-3                          | spatzle 1b, spatzle 1b             | ACYPI41073       |              |                    |                 | 649 (4e-83)        |
| signaling   | toll pathway                                      | spz1-4      | spätzle 1-4                          | spatzle 1b, spatzle 1b             | ACYPI52992       |              |                    |                 | 649 (5e-71)        |

| Class     | Role in Insect Immunity                       | Gene Symbol | Gene Name                                     | Other Gene Names                                | ACYPI identifier | NCBI gene ID | NCBI transcript ID             | NCBI protein ID                | Myzus ID (e-value) |
|-----------|-----------------------------------------------|-------------|-----------------------------------------------|-------------------------------------------------|------------------|--------------|--------------------------------|--------------------------------|--------------------|
| signaling | toll pathway                                  | spz1-5      | spätzle 1-5                                   | spatzle 1b, spaetzle 1b                         | ACYPI21155       |              |                                |                                | 649 (3e-65)        |
| signaling | toll pathway                                  | spz2        | spätzle 2                                     | spatzle 2                                       | ACYPI003414      | 100162252    | XM_001948424.1                 | XP_001948459.1                 | 649 (2e-10)        |
| signaling | toll pathway                                  | spz3        | spätzle 3                                     | spatzle 3                                       | ACYPI55738       |              |                                |                                | 649 (3e-4)         |
| signaling | toll pathway                                  | spz4        | spätzle 4                                     | spatzle 4                                       | ACYPI006811      | 100165897    | XM_001949337.1                 | XP_001949372.1                 | no hit             |
| signaling | toll pathway                                  | spz6        | spätzle 6                                     | spatzle 6                                       | ACYPI001990      | 100160712    | XM_001944011.1                 | XP_001944046.1                 | no hit             |
| signaling | toll pathway                                  | spz-like    | spätzle-like, partial                         | spatzle, spaetzle                               | ACYPI009165      | 100168467    | XM_001946778.1                 | XP_001946813.1                 | no hit             |
| signaling | some tolls function in toll signaling pathway | 18w         | 18 wheeler                                    | Toll, Toll-2                                    | ACYPI008698      | 100167952    | XM_001946908.1                 | <a href="#">XP_001946943.1</a> | 6369 (6e-28)       |
| signaling | some tolls function in toll signaling pathway | Toll        | Toll-like                                     |                                                 | ACYPI000177      | 100158739    | <a href="#">XM_001942698.1</a> | XP_001942733.1                 | 5712 (4e-115)      |
| signaling | some tolls function in toll signaling pathway | Toll        | Toll-like                                     |                                                 | ACYPI002340      | 100161089    | XM_001946411.1                 | <a href="#">XP_001946446.1</a> | 5712 (4e-122)      |
| signaling | some tolls function in toll signaling pathway | Toll        | Toll-like, partial                            |                                                 | ACYPI004287      | 100163187    | <a href="#">XM_001949147.1</a> | XP_001949182.1                 | 5712 (2e-109)      |
| signaling | some tolls function in toll signaling pathway | Toll-6      | Toll-6                                        |                                                 | ACYPI005417      | 100164395    | XM_001947289.1                 | <a href="#">XP_001947324.1</a> | 6369 (1e-34)       |
| signaling | some tolls function in toll signaling pathway | Toll        | Toll-like                                     |                                                 | ACYPI008268      | 100167471    | <a href="#">XM_001950727.1</a> | XP_001950762.1                 | 6369 (5e-19)       |
| signaling | some tolls function in toll signaling pathway | Tollo       | Tollo                                         | Toll-8                                          | ACYPI002754      | 100161538    | XM_001948531.1                 | <a href="#">XP_001948566.1</a> | 6369 (1e-44)       |
| signaling | toll pathway                                  | tub         | tube                                          | interleukin-1 receptor-associated kinase 4      | ACYPI006580      | 100165647    | XM_001950581.1                 | XP_001950616.1                 | 4836 (2e-113)      |
| signaling | toll pathway                                  | Myd88       | myeloid differentiation primary response gene |                                                 | ACYPI001638      | 100160335    | XM_001948285.1                 | XP_001948320.1                 | 1295 (9e-168)      |
| signaling | toll pathway                                  | pll         | pelle                                         |                                                 | ACYPI009928      | 100169297    | XM_001942995.1                 | XP_001943030.1                 | 4836 (2e-38)       |
| signaling | toll pathway                                  | cact        | cactus                                        |                                                 | ACYPI006820      | 100165906    | XM_001950793.1                 | XP_001950828.1                 | 259 (3e-135)       |
| signaling | toll pathway                                  | cactin      | cactin                                        |                                                 | ACYPI006968      | 100166064    | XM_001952252.1                 | XP_001952287.1                 | 2493 (0)           |
| signaling | toll pathway                                  | Pli         | Pellino                                       |                                                 | ACYPI001694      | 100160395    | XM_001946247.1                 | XP_001946282.1                 | 9336 (3e-71)       |
| signaling | toll pathway                                  | Traf1       | TNF-receptor-associated factor 1              |                                                 | ACYPI000855      | 100159489    | XM_001948320.1                 | XP_001948355.1                 | 24857 (2e-7)       |
| signaling | toll pathway                                  | Traf2       | TNF-receptor-associated factor 2              | dTraf2, Traf6, TNF-receptor-associated factor 6 | not found        | not found    | not found                      | not found                      | n/a                |
| signaling | toll pathway                                  | dl          | dorsal                                        |                                                 | ACYPI003588      | 100162436    | XM_001947394.1                 | XP_001947429.1                 | 6239 (2e-119)      |
| signaling | toll pathway                                  | dlB         | dorsal B                                      |                                                 | ACYPI005133      | 100164092    | XM_001949463.1                 | XP_001949498.1                 | 6239 (3e-124)      |
| signaling | jak/stat pathway                              | dome-1      | domeless 1                                    |                                                 | ACYPI21995       | 100294629    |                                |                                | 57862 (9e-8)       |

| Class     | Role in Insect Immunity | Gene Symbol | Gene Name                                                    | Other Gene Names            | ACYPI identifier | NCBI gene ID | NCBI transcript ID | NCBI protein ID | Myzus ID (e-value) |
|-----------|-------------------------|-------------|--------------------------------------------------------------|-----------------------------|------------------|--------------|--------------------|-----------------|--------------------|
| signaling | jak/stat pathway        | dome-2      | domeless 2                                                   |                             | ACYPI004970      | 100163919    |                    |                 | 57862 (6e-8)       |
| signaling | jak/stat pathway        | dome-3      | domeless 3                                                   |                             | ACYPI21996       | 100294630    |                    |                 | 57862 (3e-8)       |
| signaling | jak/stat pathway        | dome-4      | domeless 4, 5' partial                                       |                             | ACYPI40957       | 100294721    |                    |                 | no hit             |
| signaling | jak/stat pathway        | Jak         | Janus kinase                                                 | hopscotch                   | ACYPI008118      | 100167312    | XM_001948012.1     | XP_001948047.1  | 1739 (2e-158)      |
| signaling | jak/stat pathway        | Stat92E-1   | Signal-transducer and activator of transcription 1           | Stat                        | ACYPI002351      | 100161101    | XM_001946610.1     | XP_001946645.1  | 2173 (4e-114)      |
| signaling | jak/stat pathway        | Stat92E-2   | Signal-transducer and activator of transcription 1 , partial | Stat                        | ACYPI005642      | 100164649    | XM_001943623.1     | XP_001943658.1  | 65719 (5e-27)      |
| signaling | jak/stat pathway        | upd         | unpaired                                                     |                             | not found        | not found    | not found          | not found       | n/a                |
| signaling | imd pathway             | imd         | immune deficiency                                            |                             | not found        | not found    | not found          | not found       | n/a                |
| signaling | imd pathway             | dFadd       | dFadd                                                        | <i>Drosophila BG4, FADD</i> | not found        | not found    | not found          | not found       | n/a                |
| signaling | imd pathway             | Dredd       | Death related ced-3                                          | caspase 8                   | not found        | not found    | not found          | not found       | n/a                |
| signaling | imd pathway             | Rel         | Relish                                                       | Nf-KB, REL                  | not found        | not found    | not found          | not found       | n/a                |
| signaling | imd pathway             | Tab2        | TAK1-associated Binding Protein2                             |                             | ACYPI002796      | 100161584    | XM_001950344.1     | XP_001950379.1  | 5307 (5e-106)      |
| signaling | imd pathway             | Tak1        | TGF- $\beta$ activated kinase 1                              |                             | ACYPI001063      | 100159713    | XM_001944422.1     | XP_001944457.1  | 2842 (3e-88)       |
| signaling | imd pathway             | key         | kenny                                                        | IKKgamma                    | not found        | not found    | not found          | not found       | not found          |
| signaling | imd pathway             | lap2        | Inhibitor of apoptosis 2                                     |                             | ACYPI000445      | 100159034    | XM_001942899.1     | XP_001942934.1  | 60268 (2e-27)      |
| signaling | imd pathway             | ird5        | immune response deficiency 5                                 | IKK                         | ACYPI004933      | 100163880    | XM_001952347.1     | XP_001952382.1  | 7578 (3e-90)       |
| signaling | jnk pathway             | hep         | hemipterous                                                  |                             | ACYPI005993      | 100165019    | XM_001944492.1     | XP_001944527.1  | 8122 (8e-46)       |
| signaling | jnk pathway             | bsk         | basket                                                       | MAPK, JNK                   | ACYPI004372      | 100163276    | XM_001945425.1     | XP_001945460.1  | 1929 (1e-88)       |
| signaling | jnk pathway             | Jra         | Jun-related antigen                                          |                             | ACYPI002386      | 100161138    | XM_001947521.1     | XP_001947556.1  | 6809 (1e-89)       |
| signaling | jnk pathway             | kay         | kayak                                                        |                             | not found        | not found    | not found          | not found       | n/a                |
| signaling | JNK pathway             | egr         | eiger                                                        |                             | ACYPI001133      | 100159786    | XM_001952555.1     | XP_001952590.1  | 1287(2e-131)       |
| response  | antimicrobial peptide   |             | Abaecin                                                      |                             | not found        | not found    | not found          | not found       | n/a                |
| response  | antimicrobial peptide   |             | Alloferon                                                    |                             | not found        | not found    | not found          | not found       | n/a                |
| response  | antimicrobial peptide   |             | Andropin                                                     |                             | not found        | not found    | not found          | not found       | n/a                |
| response  | antimicrobial peptide   |             | Apisimin                                                     |                             | not found        | not found    | not found          | not found       | n/a                |



| Class    | Role in Insect Immunity | Gene Symbol | Gene Name     | Other Gene Names | ACYPI identifier              | NCBI gene ID | NCBI transcript ID | NCBI protein ID | Myzus ID (e-value) |
|----------|-------------------------|-------------|---------------|------------------|-------------------------------|--------------|--------------------|-----------------|--------------------|
| response | antimicrobial peptide   | Att         | Attacin       |                  | not found                     | not found    | not found          | not found       | n/a                |
| response | antimicrobial peptide   | Cec         | Cecropin      |                  | not found                     | not found    | not found          | not found       | n/a                |
| response | antimicrobial peptide   |             | Coleopteracin |                  | not found                     | not found    | not found          | not found       | n/a                |
| response | antimicrobial peptide   | Def         | Defensin      |                  | not found                     | not found    | not found          | not found       | n/a                |
| response | antimicrobial peptide   |             | Diptericin    |                  | not found                     | not found    | not found          | not found       | n/a                |
| response | antimicrobial peptide   |             | Drosocin      |                  | not found                     | not found    | not found          | not found       | n/a                |
| response | antimicrobial peptide   |             | Drosomycin    |                  | not found                     | not found    | not found          | not found       | n/a                |
| response | antimicrobial peptide   |             | Formicin      |                  | not found                     | not found    | not found          | not found       | n/a                |
| response | antimicrobial peptide   |             | Gambicin      |                  | not found                     | not found    | not found          | not found       | n/a                |
| response | antimicrobial peptide   |             | Gomesin       |                  | not found                     | not found    | not found          | not found       | n/a                |
| response | antimicrobial peptide   |             | Heliocin      |                  | not found                     | not found    | not found          | not found       | n/a                |
| response | antimicrobial peptide   |             | Holotricin    |                  | not found                     | not found    | not found          | not found       | n/a                |
| response | antimicrobial peptide   |             | Lebocin       |                  | not found                     | not found    | not found          | not found       | n/a                |
| response | antimicrobial peptide   |             | Megourin      |                  | not found,<br>though see text | not found    | not found          | not found       | n/a                |
| response | antimicrobial peptide   |             | Metchnikowin  |                  | not found                     | not found    | not found          | not found       | n/a                |
| response | antimicrobial peptide   |             | Moricin       |                  | not found                     | not found    | not found          | not found       | n/a                |
| response | antimicrobial peptide   |             | Penaeidin     |                  | not found,<br>though see text | not found    | not found          | not found       | n/a                |
| response | antimicrobial peptide   |             | Polyphemusin  |                  | not found                     | not found    | not found          | not found       | n/a                |
| response | antimicrobial peptide   |             | Spingerin     |                  | not found                     | not found    | not found          | not found       | n/a                |
| response | antimicrobial peptide   |             | Tachyplesin   |                  | not found                     | not found    | not found          | not found       | n/a                |
| response | antimicrobial peptide   |             | Virescein     |                  | not found                     | not found    | not found          | not found       | n/a                |
| response | antimicrobial peptide   | Thm1        | Thaumatin1    | Tha, Thn         | ACYPI005841                   | 100164856    | XM_001942683.1     | XP_001942718.1  | 81361<br>(1e-8)    |
| response | antimicrobial peptide   | Thm2        | Thaumatin2    | Tha, Thn         | ACYPI001394                   | 100160062    | XM_001942537.1     | XP_001942572.1  | 81361<br>(2e-8)    |
| response | antimicrobial peptide   | Thm3        | Thaumatin3    | Tha, Thn         | ACYPI009605                   | 100168942    | XM_001942744.1     | XP_001942779.1  | 81361<br>(2e-9)    |
| response | antimicrobial peptide   | Thm4        | Thaumatin4    | Tha, Thn         | ACYPI003287                   | 100162111    | XM_001942495.1     | XP_001942530.1  | 81361<br>(2e-9)    |
| response | antimicrobial peptide   | Thm5        | Thaumatin5    | Tha, Thn         | ACYPI007568                   | 100166717    | XM_001951871.1     | XP_001951906.1  | 9364<br>(5e-22)    |

| Class    | Role in Insect Immunity                 | Gene Symbol | Gene Name                                      | Other Gene Names       | ACYPI identifier | NCBI gene ID | NCBI transcript ID | NCBI protein ID | Myzus ID (e-value) |
|----------|-----------------------------------------|-------------|------------------------------------------------|------------------------|------------------|--------------|--------------------|-----------------|--------------------|
| response | antimicrobial peptide                   | Thm6        | Thaumatin6                                     | Tha, Thn               | ACYPI005301      | 100164271    | XM_001942753.1     | XP_001942788.1  | 81361 (3e-15)      |
| response | microbial degradation                   | Lys1        | Lysozyme, i-type                               |                        | ACYPI002175      | 100160909    | XM_001949053.1     | XP_001949088.1  | 3094 (8e-63)       |
| response | microbial degradation                   | Lys2        | Lysozyme, i-type                               |                        | ACYPI009125      | 100168424    | XM_001949177.1     | XP_001949212.1  | 584 (3e-80)        |
| response | microbial degradation                   | Lys3        | Lysozyme, i-type                               |                        | ACYPI008509      | 100167742    | XM_001949283.1     | XP_001949318.1  | 74639 (7e-27)      |
| response | fungal degradation                      | Cht1        | Chitinase-like protein 1                       |                        | ACYPI001365      | 100160032    | XM_001943565.1     | XP_001943600.1  | 3640 (0)           |
| response | fungal degradation                      | Cht2        | Chitinase-like protein 2                       | Drosophila chitinase 3 | ACYPI010095      | 100169480    | XM_001943003.1     | XP_001943038.1  | 5202 (1e-52)       |
| response | fungal degradation                      | Cht3        | Chitinase-like protein 3                       |                        | ACYPI001396      | 100160065    | XM_001942561.1     | XP_001942596.1  | 5202 (6e-73)       |
| response | fungal degradation                      | Cht4        | Chitinase-like protein 4                       |                        | ACYPI006403      | 100165452    | XM_001950345.1     | XP_001950380.1  | 5202 (2e-168)      |
| response | fungal degradation                      | Cht5        | Chitinase-like protein 5                       |                        | ACYPI009964      | 100169337    | XM_001947381.1     | XP_001947416.1  | 5202 (2e-52)       |
| response | fungal degradation                      | Cht6        | Chitinase-like protein 6                       |                        | ACYPI009878      | 100169240    | XM_001952683.1     | XP_001952718.1  | 5202 (3e-50)       |
| response | fungal degradation                      | Cht7        | Chitinase-like protein 7                       |                        | ACYPI005756      | 100164767    | XM_001947852.1     | XP_001947887.1  | 1327 (4e-162)      |
| response | general stress response                 | TotA        | Turandot A                                     |                        | not found        | not found    | not found          | not found       | n/a                |
| response | general stress response                 | TotB        | Turandot B                                     |                        | not found        | not found    | not found          | not found       | n/a                |
| response | general stress response                 | TotC        | Turandot C                                     |                        | not found        | not found    | not found          | not found       | n/a                |
| response | general stress response                 | TotF        | Turandot F                                     |                        | not found        | not found    | not found          | not found       | n/a                |
| response | general stress response                 | TotM        | Turandot M                                     |                        | not found        | not found    | not found          | not found       | n/a                |
| response | general stress response                 | TotZ        | Turandot Z                                     |                        | not found        | not found    | not found          | not found       | n/a                |
| response | mark pathogens for phagocytosis         | TepI        | Thiolester containing protein I                |                        | not found        | not found    | not found          | not found       | n/a                |
| response | mark pathogens for phagocytosis         | TepII       | Thiolester containing protein II               |                        | not found        | not found    | not found          | not found       | n/a                |
| response | mark pathogens for phagocytosis         | TepIII-1    | Thiolester containing protein III – 1, partial |                        | ACYPI005292      | 100164261    | XM_001944313.1     | XP_001944348.1  | no hit             |
| response | mark pathogens for phagocytosis         | TepIII-2    | Thiolester containing protein III – 2          |                        | ACYPI000145      | 100158705    | XM_001945685.1     | XP_001945720.1  | no hit             |
| response | mark pathogens for phagocytosis         | TepIV       | Thiolester containing protein IV               |                        | not found        | not found    | not found          | not found       | n/a                |
| response | prophenoloxidase response               | ProPO1      | Prophenoloxidase 1                             | Diphenol oxidase A3    | ACYPI001367      | 100160034    | XM_001949272.1     | XP_001949307.1  | 5431 (5e-147)      |
| response | prophenoloxidase response               | ProPO2      | Prophenoloxidase 2                             | Diphenol oxidase A3    | ACYPI004484      | 100163393    | XM_001951102.1     | XP_001951137.1  | 5721 (e3-133)      |
| response | production of nitric oxide, a toxic gas | Nos         | Nitric oxide synthase                          |                        | ACYPI001689      | 100160390    | XM_001946174.1     | XP_001946209.1  | 462 (1e-35)        |

| Class    | Role in Insect Immunity | Gene Symbol | Gene Name                                   | Other Gene Names | ACYPI identifier | NCBI gene ID | NCBI transcript ID | NCBI protein ID | Myzus ID (e-value) |
|----------|-------------------------|-------------|---------------------------------------------|------------------|------------------|--------------|--------------------|-----------------|--------------------|
| response | general stress response | Hsc5        | Heat shock cognate 5                        |                  | ACYPI004693      | 100163620    | XM_001950464.1     | XP_001950499.1  |                    |
| response | general stress response | Hsc70       | Heat shock cognate 70                       |                  | ACYPI007166      | 100166283    | XM_001948031.1     | XP_001948066.1  | 1624 (0)           |
| response | general stress response | Hsc70-1     | Heat shock cognate 70 - 1                   |                  | ACYPI000474      | 100159065    | XM_001951198.1     | XP_001951233.1  | 182 (0)            |
| response | general stress response | Hsc70-2     | Heat shock cognate 70 - 2                   |                  | ACYPI004809      | 100163748    | XM_001951351.1     | XP_001951386.1  | 182 (0)            |
| response | general stress response | Hsc70Cb     | Heat shock cognate 70 - Cb                  |                  | ACYPI004544      | 100163455    | XM_001951757.1     | XP_001951792.1  | 2297 (0)           |
| response | general stress response | Hsp14       | Heat shock protein 14                       |                  | ACYPI002719      | 100161502    | XM_001945733.1     | XP_001945768.1  | 3375 (0)           |
| response | general stress response | Hsp21.4     | Heat shock protein 21.4                     |                  | ACYPI003907      | 100162777    | XM_001949367.1     | XP_001949402.1  | 6174 (2e-108)      |
| response | general stress response | Hsp60       | Heat shock protein 60                       |                  | ACYPI009253      | 100168563    | XM_001951338.1     | XP_001951373.1  | 317 (6e-155)       |
| response | general stress response | Hsp70Aa     | Heat shock protein 70Aa                     |                  | ACYPI009117      | 100168413    | XM_001951880.1     | XP_001951915.1  | 182 (0)            |
| response | general stress response | Hsp70Ab     | Heat shock protein 70Ab                     |                  | ACYPI007961      | 100167145    | XM_001949626.1     | XP_001949661.1  | 182 (0)            |
| response | general stress response | Hsp70Ba     | Heat shock protein 70Ba                     |                  | ACYPI008763      | 100168026    | XM_001949802.1     | XP_001949837.1  | 182 (0)            |
| response | general stress response | Hsp83       | Heat shock protein 83                       |                  | ACYPI009380      | 100168702    | XM_001944726.1     | XP_001944761.1  | 1268 (0)           |
| response | general stress response | Hsp83       | Heat shock protein 83                       |                  | ACYPI002010      | 100160736    | XM_001943137.1     | XP_001943172.1  | 1268 (0)           |
| response | general stress response | Hsp90       | Heat shock protein 90                       |                  | ACYPI002398      | 100161155    | XM_001951175.1     | XP_001951210.1  | 5927 (1e-149)      |
| response | general stress response | Hsp90       | Heat shock protein 90                       |                  | ACYPI009915      | 100169283    | XM_001948902.1     | XP_001948937.1  | 3803 (0)           |
| response | detoxification          | Gst         | Glutathione S-transferase-like, microsomal  |                  | ACYPI004835      | 100163775    | XM_001951200.1     | XP_001951235.1  | 3849 (8e-76)       |
| response | detoxification          | Gst         | Glutathione S-transferase-like, microsomal  |                  | ACYPI006691      | 100165764    | XM_001946296.1     | XP_001946331.1  | 3849 (5e-37)       |
| response | detoxification          | Gst         | Glutathione S-transferase-like, sigma class |                  | ACYPI000794      | 100159421    | XM_001952064.1     | XP_001952099.1  | 3513 (3e-99)       |
| response | detoxification          | Gst         | Glutathione S-transferase-like, sigma class |                  | ACYPI002127      | 100160859    | XM_001952005.1     | XP_001952040.1  | 3896 (1e-105)      |
| response | detoxification          | Gst         | Glutathione S-transferase-like, sigma class |                  | ACYPI002679      | 100161459    | XM_001952021.1     | XP_001952056.1  | 3896 (1e-100)      |
| response | detoxification          | Gst         | Glutathione S-transferase-like, sigma class |                  | ACYPI009326      | 100168645    | XM_001952392.1     | XP_001952427.1  | 1197 (6e-82)       |
| response | detoxification          | Gst         | Glutathione S-transferase-like, sigma class |                  | ACYPI009519      | 100168850    | XM_001946569.1     | XP_001946604.1  | 1197 (2e-102)      |
| response | detoxification          | Gst         | Glutathione S-transferase-like, sigma class |                  | ACYPI009520      | 100168850    | XM_001946504.1     | XP_001946539.1  | 1197 (2e-102)      |
| response | detoxification          | GstD        | Glutathione S-transferase, delta class      |                  | ACYPI006899      | 100165990    | XM_001951401.1     | XP_001951436.1  | 2376 (4e-56)       |
| response | detoxification          | GstD        | Glutathione S-transferase, delta class      |                  | ACYPI009586      | 100168923    | XM_001952561.1     | XP_001952596.1  | 2376 (5e-38)       |

| Class    | Role in Insect Immunity    | Gene Symbol | Gene Name                                       | Other Gene Names | ACYPI identifier | NCBI gene ID | NCBI transcript ID | NCBI protein ID | Myzus ID (e-value) |
|----------|----------------------------|-------------|-------------------------------------------------|------------------|------------------|--------------|--------------------|-----------------|--------------------|
| response | detoxification             | GstD10      | Glutathione S-transferase, delta class          |                  | ACYPI008042      | 100167231    | XM_001948159.1     | XP_001948194.1  | 2376 (7e-73)       |
| response | detoxification             | GstD4       | Glutathione S-transferase, delta class          |                  | ACYPI001068      | 100159718    | XM_001942679.1     | XP_001942714.1  | 2376 (1e-84)       |
| response | detoxification             | GstD6       | Glutathione S-transferase, delta class          |                  | ACYPI006598      | 100165666    | XM_001952338.1     | XP_001952373.1  | 2376 (4e-53)       |
| response | detoxification             | GstD6       | Glutathione S-transferase, delta class, partial |                  | ACYPI008550      | 100167788    | XM_001952381.1     | XP_001952416.1  | 2376 (3e-52)       |
| response | detoxification             | GstD8       | Glutathione S-transferase, delta class          |                  | ACYPI008657      | 100167906    | XM_001942576.1     | XP_001942611.1  | 2376 (9e-112)      |
| response | detoxification             | GstD9       | Glutathione S-transferase, delta class          |                  | ACYPI005620      | 100164626    | XM_001950500.1     | XP_001950535.1  | 569 (1e-123)       |
| response | detoxification             | Gst         | Glutathione S-transferase, theta class          |                  | ACYPI007233      | 100166353    | XM_001949321.1     | XP_001949356.1  | 6981 (2e-79)       |
| response | detoxification             | Gst         | Glutathione S-transferase, theta class          |                  | ACYPI009122      | 100168419    | XM_001949359.1     | XP_001949394.1  | 9615 (3e-73)       |
| response | alarm pheromone production | IPPS        | Isoprenyl diphosphate synthase                  |                  | ACYPI000050      | 100144905    | NM_001126161.3     | NP_001119633.3  | 912 (0)            |
| response | alarm pheromone production | FPPS        | similar to Farnesyl diphosphate synthase 2      |                  | ACYPI007080      | 100166187    | XM_001950388.1     | XP_001950423.1  | 912 (0)            |

**Table S2. Samples for qPCR expression study.**

| <b>Sample Name</b>                   | <b>Sample Handling Notes</b>                   |
|--------------------------------------|------------------------------------------------|
| <b>Bacterial Stabbing Experiment</b> |                                                |
| No stab control                      | Frozen 8hrs after exposure of treatment aphids |
| Sterile stab                         | Frozen 8hrs after exposure                     |
| <i>E. coli</i> stab                  | Frozen 8hrs after exposure                     |
| Gram- pathogen stab                  | Frozen 8hrs after exposure                     |
| Gram+ pathogen stab                  | Frozen 8hrs after exposure                     |
| <b>Bacterial Feeding Experiment</b>  |                                                |
| Feed control                         | Frozen 12hrs after exposure to diet            |
| <i>E. coli</i> feed                  | Frozen 12hrs after exposure to diet            |
| Gram- pathogen feed                  | Frozen 12hrs after exposure to diet            |
| <b>Fungal Shower Experiment</b>      |                                                |
| Fungus control                       | Frozen 24hrs after exposure                    |
| Fungus infected                      | Frozen 24hrs after exposure                    |
| <b>Viral Stabbing Experiment</b>     |                                                |
| Virus control (no stab)              | Frozen 16hrs after exposure                    |
| Virus infected                       | Frozen 16hrs after exposure                    |
| <b>Stress Experiment</b>             |                                                |
| No stress Control                    | Frozen at beginning of stress experiment       |
| Alarm pheromone                      | Frozen minutes after exposure to EBF           |
| Post alarm pheromone                 | Frozen 12hrs after exposure to EBF             |
| Heat stress                          | Frozen immediately after 36°C heat shock       |
| Post heat stress                     | Frozen 8hrs after being returned to 20°C       |
| Starvation                           | Frozen 12hrs after being removed from plant    |

**Table S3. Primers for qPCR expression study.**

| Gene symbol | Gene name                                          | Putative function                | ACYPI ID    | Primer Pair (5' to 3')                                                         |
|-------------|----------------------------------------------------|----------------------------------|-------------|--------------------------------------------------------------------------------|
| GNBP2       | gram-negative binding protein 2                    | recognition                      | ACYPI006143 | gnbp2_1f: AATTTCCGTGATGGGTGTTTAAAGT<br>gnbp2_1r: TTTGTTTTTCATTCCATGTTGATGAC    |
| Gale1       | galectin 1                                         | recognition and response         | ACYPI001371 | gale_1f: GCTCCAATACTCAATCCGACTCTT<br>gale_1r: CATCGTCCTTGTTCAAAACC             |
| Tl1         | toll                                               | toll signaling pathway           | ACYPI000177 | tl1_1f: GAGCTCACCGTTTAAACTTTGTCA<br>tl1_1r: CATCAACTGAACGAGCAATTTGA            |
| Cact        | cactus                                             | toll signaling pathway           | ACYPI006820 | cact_1f: GATGGCCAAAGTGCTCTTCATT<br>cact_1r: GAGCTTTCATTAGGTGTTTCACAATTT        |
| Dl1         | dorsal 1b                                          | toll signaling pathway           | ACYPI003588 | dl_1f: CAAGAGAATAGAAAACCATCGTCTA<br>dl_1r: AAACATCAGTGTTATGCGGCTAAG            |
| DlB         | dorsal 1b                                          | toll signaling pathway           | ACYPI005133 | dlb_1f: CTCTCAGAGTACGAGAAGAAATAAGAGTAGAT<br>dlb_1r: AAACATCAGTGTTATGCGGCTAAG   |
| Myd88       | myeloid differentiation primary response gene      | toll signaling pathway           | ACYPI001638 | myd88_1f: TGCATGTTAAATGCCACGAAA<br>myd88_1r: TCCTCTCCAATCCCTGGGTAA             |
| IRD5        | immune response deficient 5                        | imd/jnk pathway                  | ACYPI004933 | IRD5_1f: TGCTTATCTTGACCCGGAAGT<br>IRD5_1r: ACTATGACTCCAACACTCCACATATCTAA       |
| Bsk         | basket (JNK)                                       | jnk pathway                      | ACYPI004372 | Basket_1f: TTTGATCGATTATTCCTGATGTACT<br>Basket_1r: GTGCTTGGCTTGCTTTTAGTTTTATT  |
| JRA1        | Jun-related antigen                                | imd/jnk pathway                  | ACYPI002386 | Jra_1f: AAATCAAACCTCGAAAGGAAAAGACA<br>Jra_1r: TTCGGCGGCATTTGGA                 |
| IAP2        | inhibitor of apoptosis 2                           | imd/jnk pathway                  | ACYPI000445 | lap2_10f: TCGATGAACACAAACGTCACAA<br>lap2_10r: GTTCACCAGTTTCCTTATGATTTTCAA      |
| Stat92E-2   | Signal-transducer and activator of transcription 2 | Jak/Stat pathway                 | ACYPI005642 | Stat2_37f: TCATTAGTTCAGTGGAAACGTC AAC<br>Stat2_37r: AATCACACAATTTCTCACACCAAGTT |
| Lys1        | lysozyme, i-type                                   | response to bacteria             | ACYPI002175 | lysoz1_1f: CGCACAGGACTGCAACCA<br>lysoz1_1r: GGATGGCCGCGTAATCAG                 |
| Lys2        | lysozyme, i-type                                   | response to bacteria             | ACYPI009125 | Lys2_10f: GCGTCAGAGACCCGATTGTC<br>Lys2_10r: GCAATCCTTTGCGTATCTCTGTATG          |
| Lys3        | lysozyme, i-type                                   | response to bacteria             | ACYPI008509 | lysoz3_1f: CCGGTCAGTAGCAGAGGAAAGT<br>lysoz3_1r: ATGAGCTCTCGCGTAGTTTGG          |
| Thm2        | thaumatin 2                                        | response (antimicrobial peptide) | ACYPI001394 | Tha2_r1f: CAACAGTAAAGGAAAATGCGAAAC<br>Tha2_r1r: TGGCACGCCCATGATACC             |
| Thm3        | thaumatin 3                                        | response (antimicrobial peptide) | ACYPI009605 | Tha3_1f: GGGCAGGCAGGATTTGG<br>Tha3_1r: TTGGATCTTGTTCGCCGAAT                    |
| Thm4        | thaumatin 4                                        | response (antimicrobial peptide) | ACYPI003287 | Tha4_1f: GGCGGCAGGATTTGG<br>Tha4_1r: GTGGATCTTGTTCGCCGAAT                      |
| Thm6        | thaumatin 6                                        | response (antimicrobial peptide) | ACYPI005301 | Tha6_1f: AAAATGCAGCGCTCAAGGA<br>Tha6_1r: CACTTGATCTTGTTCGCCGAAT                |
| HSP60       | heat shock protein 60                              | response to stress               | ACYPI009253 | hsp60_1f: GATGCAATGAACGACGAATATGTTA<br>hsp60_1r: CTGACAACCTTGGTTGGATCGA        |
| HSC70       | heat shock cognate 70                              | response to stress               | ACYPI007166 | HP3f: TTGGGTGGAGAAGATTTTGA<br>HP3r: ATGACTGGCAGAAAGACCAC                       |
| HSP83       | heat shock protein 83                              | response to stress               | ACYPI002010 | HP6f: CCGTACTGATCCTGGTGAAC<br>HP6r: GCCAATGAATTGAGAGTGCT                       |

**Table S4. Expression of recognition and signaling genes.** Values indicate the relative expression of a gene in a sample relative to expression in the appropriate control sample, +/- one standard deviation. For the bacterial stabbing experiment, we compared a sterile stab sample to a no stab sample only for genes that showed greater than 2-fold upregulation in one of the bacteria-stabbed samples. Relative expression values should be interpreted with caution as they are based on only a single experimental replicate pooling five aphids.

|                      | GNBP2       | GALE1       | TOLL        | CACTUS      | DOR1        | DOR1B       | MYD88       | IRD5        | JNK         | JRA1        | IAP2        | JAK         | STAT92E2    |
|----------------------|-------------|-------------|-------------|-------------|-------------|-------------|-------------|-------------|-------------|-------------|-------------|-------------|-------------|
| No stab control      | 1.00+/-1.05 | 1.00+/-0.08 | 1.00+/-0.03 | 1.00+/-0.06 | 1.00+/-0.16 | 1.00+/-0.05 | 1.00+/-0.12 | 1.00+/-0.07 | 1.00+/-0.06 | 1.00+/-0.02 | 1.00+/-0.04 | 1.00+/-0.12 | 1.00+/-0.11 |
| Sterile stab         |             |             | 3.01+/-0.07 | 0.66+/-0.02 |             |             |             |             |             |             | 0.48+/-0.03 |             |             |
| <i>E. coli</i> stab  | 0.49+/-0.05 | 0.66+/-0.02 | 5.53+/-0.48 | 2.18+/-0.13 | 1.66+/-0.07 | 0.72+/-0.03 | 0.82+/-0.06 | 0.45+/-0.04 | 0.87+/-0.05 | 1.19+/-0.03 | 1.64+/-0.08 | 0.84+/-0.78 | 0.46+/-0.04 |
| Gram-pathogen stab   | 0.59+/-0.06 | 0.78+/-0.12 | 2.52+/-0.21 | 1.78+/-0.33 | 0.84+/-0.06 | 0.65+/-0.02 | 1.26+/-0.08 | 0.43+/-0.06 | 0.76+/-0.02 | 0.85+/-0.06 | 2.00+/-0.06 | 0.77+/-0.06 | 0.59+/-0.04 |
| Gram+pathogen stab   | 0.82+/-0.04 | 0.69+/-0.02 | 2.28+/-0.22 | 1.42+/-0.06 | 0.89+/-0.05 | 0.51+/-0.05 | 0.99+/-0.05 | 0.51+/-0.05 | 0.69+/-0.04 | 0.91+/-0.05 | 2.43+/-0.16 | 0.73+/-0.04 | 0.42+/-0.02 |
| Feed control         | 1.00+/-0.05 | 1.00+/-0.07 | 1.00+/-0.10 | 1.00+/-0.07 | 1.00+/-0.05 | 1.00+/-0.08 | 1.00+/-0.07 | 1.00+/-0.03 | 1.00+/-0.10 | 1.00+/-0.07 | 1.00+/-0.06 | 1.00+/-0.08 | 1.00+/-0.08 |
| <i>E. coli</i> feed  | 1.01+/-0.05 | 0.77+/-0.05 | 1.45+/-0.19 | 2.06+/-0.12 | 0.88+/-0.07 | 0.80+/-0.05 | 0.91+/-0.03 | 1.00+/-0.03 | 0.72+/-0.05 | 1.04+/-0.07 | 1.15+/-0.06 | 0.77+/-0.02 | 0.74+/-0.10 |
| Gram-pathogen feed   | 0.82+/-0.06 | 0.63+/-0.05 | 1.41+/-0.15 | 1.35+/-0.05 | 0.84+/-0.08 | 0.70+/-0.03 | 0.63+/-0.03 | 1.03+/-0.04 | 0.70+/-0.05 | 0.95+/-0.03 | 1.46+/-0.10 | 0.64+/-0.02 | 0.69+/-0.07 |
| Fungus control       | 1.00+/-0.07 | 1.00+/-0.03 | 1.00+/-0.08 | 1.00+/-0.02 | 1.00+/-0.07 | 1.00+/-0.04 | 1.00+/-0.09 | 1.00+/-0.09 | 1.00+/-0.06 | 1.00+/-0.08 | 1.00+/-0.04 | 1.00+/-0.07 | 1.00+/-0.04 |
| Fungus infected      | 0.91+/-0.03 | 1.20+/-0.18 | 1.16+/-0.10 | 0.87+/-0.11 | 1.06+/-0.02 | 1.00+/-0.07 | 1.00+/-0.05 | 0.62+/-0.07 | 1.30+/-0.10 | 1.00+/-0.03 | 0.88+/-0.03 | 1.32+/-0.07 | 1.32+/-0.09 |
| Virus control        | 1.00+/-0.02 | 1.00+/-0.04 | 1.00+/-0.03 | 1.00+/-0.03 | 1.00+/-0.08 | 1.00+/-0.06 | 1.00+/-0.02 | 1.00+/-0.04 | 1.00+/-0.06 | 1.00+/-0.07 | 1.00+/-0.10 | 1.00+/-0.03 | 1.00+/-0.12 |
| Virus infected       | 0.88+/-0.03 | 1.01+/-0.04 | 1.23+/-0.14 | 0.83+/-0.02 | 1.59+/-0.05 | 0.97+/-0.04 | 0.87+/-0.05 | 0.92+/-0.06 | 0.93+/-0.03 | 1.16+/-0.06 | 0.98+/-0.07 | 1.40+/-0.11 | 2.42+/-0.27 |
| No stress control    | 1.00+/-0.10 | 1.00+/-0.14 | 1.00+/-0.03 | 1.00+/-0.02 | 1.00+/-0.07 | 1.00+/-0.07 | 1.00+/-0.04 | 1.00+/-0.06 | 1.00+/-0.04 | 1.00+/-0.04 | 1.00+/-0.08 | 1.00+/-0.06 | 1.00+/-0.06 |
| Alarm pheromone      | 0.79+/-0.05 | 0.80+/-0.07 | 0.94+/-0.03 | 2.41+/-0.24 | 0.96+/-0.05 | 0.87+/-0.04 | 0.74+/-0.02 | 0.95+/-0.13 | 0.97+/-0.06 | 0.96+/-0.03 | 1.37+/-0.09 | 1.15+/-0.07 | 0.98+/-0.05 |
| Post alarm pheromone | 0.54+/-0.03 | 0.94+/-0.12 | 0.34+/-0.05 | 2.46+/-0.10 | 0.78+/-0.15 | 0.98+/-0.07 | 0.96+/-0.07 | 1.03+/-0.14 | 0.99+/-0.06 | 0.64+/-0.13 | 2.11+/-0.14 | 1.08+/-0.08 | 1.00+/-0.07 |
| Heat stress          | 1.35+/-0.07 | 1.14+/-0.05 | 0.74+/-0.08 | 1.48+/-0.06 | 2.59+/-0.17 | 1.71+/-0.06 | 1.01+/-0.03 | 0.94+/-0.07 | 1.14+/-0.07 | 1.17+/-0.16 | 0.68+/-0.02 | 1.27+/-0.22 | 1.97+/-0.12 |
| Post heat stress     | 0.76+/-0.04 | 0.69+/-0.09 | 0.48+/-0.02 | 1.68+/-0.10 | 0.75+/-0.11 | 0.63+/-0.08 | 0.58+/-0.03 | 0.67+/-0.04 | 0.77+/-0.01 | 0.69+/-0.02 | 2.11+/-0.12 | 0.76+/-0.02 | 0.58+/-0.07 |
| Starvation           | 2.14+/-0.42 | 1.16+/-0.03 | 0.64+/-0.05 | 3.29+/-0.27 | 1.79+/-0.12 | 1.36+/-0.06 | 0.76+/-0.06 | 0.86+/-0.11 | 1.20+/-0.06 | 0.44+/-0.08 | 1.13+/-0.14 | 1.37+/-0.07 | 1.03+/-0.12 |

**Table S5. Expression of response genes.** Values indicate the relative expression of a gene in a sample relative to expression in the appropriate control sample, +/- S.D. For the bacterial stabbing experiment, we compared a sterile stab sample to a no stab sample only for genes that showed greater than 2-fold upregulation in one of the bacteria-stabbed samples. Relative expression values should be interpreted with caution as they are based on only a single experimental replicate pooling five aphids.

|                      | LYS1        | LYS2        | LYS3        | THM2        | THM3        | THM4        | THM6        | HSP60       | HSC70       | HSP83       |
|----------------------|-------------|-------------|-------------|-------------|-------------|-------------|-------------|-------------|-------------|-------------|
| No stab control      | 1.00+/-0.05 | 1.00+/-0.07 | 1.00+/-0.03 | 1.00+/-0.04 | 1.00+/-0.09 | 1.00+/-0.06 | 1.00+/-0.06 | 1.00+/-0.05 | 1.00+/-0.05 | 1.00+/-0.05 |
| Sterile stab         |             |             |             | 0.74+/-0.07 |             |             |             |             |             |             |
| <i>E.coli</i> stab   | 1.00+/-0.03 | 1.35+/-0.08 | 1.76+/-0.15 | 2.37+/-0.07 | 0.34+/-0.05 | 0.29+/-0.07 | 0.39+/-0.03 | 0.81+/-0.04 | 0.58+/-0.04 | 0.80+/-0.06 |
| Gram-pathogen stab   | 1.12+/-0.07 | 1.41+/-0.05 | 1.57+/-0.07 | 1.80+/-0.03 | 1.06+/-0.04 | 0.86+/-0.08 | 1.60+/-0.06 | 0.96+/-0.05 | 0.69+/-0.05 | 1.26+/-0.07 |
| Gram+pathogen stab   | 1.12+/-0.04 | 1.59+/-0.17 | 1.62+/-0.06 | 0.56+/-0.05 | 0.58+/-0.04 | 0.51+/-0.04 | 1.01+/-0.07 | 0.84+/-0.04 | 0.66+/-0.02 | 0.97+/-0.04 |
| Feed control         | 1.00+/-0.02 | 1.00+/-0.12 | 1.00+/-0.04 | 1.00+/-0.04 | 1.00+/-0.05 | 1.00+/-0.05 | 1.00+/-0.06 | 1.00+/-0.09 | 1.00+/-0.04 | 1.00+/-0.07 |
| <i>E. coli</i> feed  | 2.16+/-0.13 | 1.17+/-0.05 | 1.18+/-0.12 | 0.77+/-0.06 | 0.67+/-0.05 | 0.69+/-0.04 | 0.59+/-0.02 | 1.17+/-0.14 | 0.80+/-0.05 | 0.77+/-0.03 |
| Gram-pathogen feed   | 2.66+/-0.22 | 0.91+/-0.05 | 1.09+/-0.02 | 0.30+/-0.08 | 0.39+/-0.02 | 0.41+/-0.02 | 0.67+/-0.03 | 0.88+/-0.05 | 0.76+/-0.03 | 0.64+/-0.03 |
| Fungus control       | 1.00+/-0.01 | 1.00+/-0.10 | 1.00+/-0.05 | 1.00+/-0.11 | 1.00+/-0.06 | 1.00+/-0.07 | 1.00+/-0.03 | 1.00+/-0.05 | 1.00+/-0.04 | 1.00+/-0.01 |
| Fungus infected      | 0.87+/-0.15 | 0.78+/-0.03 | 0.85+/-0.05 | 1.10+/-0.30 | 1.07+/-0.06 | 1.30+/-0.06 | 1.43+/-0.06 | 0.92+/-0.19 | 0.97+/-0.09 | 2.31+/-0.06 |
| Virus control        | 1.00+/-0.04 | 1.00+/-0.02 | 1.00+/-0.02 | 1.00+/-0.14 | 1.00+/-0.16 | 1.00+/-0.12 | 1.00+/-0.10 | 1.00+/-0.06 | 1.00+/-0.02 | 1.00+/-0.02 |
| Virus infected       | 0.92+/-0.04 | 0.67+/-0.03 | 0.64+/-0.02 | 0.64+/-0.06 | 0.95+/-0.14 | 0.96+/-0.11 | 0.93+/-0.13 | 0.74+/-0.02 | 0.77+/-0.07 | 1.20+/-0.06 |
| No stress control    | 1.00+/-0.02 | 1.00+/-0.05 | 1.00+/-0.02 | 1.00+/-0.06 | 1.00+/-0.11 | 1.00+/-0.04 | 1.00+/-0.05 | 1.00+/-0.08 | 1.00+/-0.07 | 1.00+/-0.05 |
| Alarm pheromone      | 0.87+/-0.13 | 0.92+/-0.03 | 0.86+/-0.03 | 0.30+/-0.04 | 0.49+/-0.01 | 1.05+/-0.04 | 1.37+/-0.05 | 0.77+/-0.02 | 1.14+/-0.02 | 1.21+/-0.05 |
| Post alarm pheromone | 0.89+/-0.04 | 0.76+/-0.04 | 0.93+/-0.01 | 0.34+/-0.07 | 0.64+/-0.03 | 0.65+/-0.05 | 0.22+/-0.05 | 1.44+/-0.15 | 1.20+/-0.05 | 1.28+/-0.03 |
| Heat stress          | 1.48+/-0.04 | 0.98+/-0.05 | 0.66+/-0.02 | 1.70+/-0.10 | 0.95+/-0.05 | 0.68+/-0.02 | 0.35+/-0.06 | 1.55+/-0.09 | 2.07+/-0.06 | 5.54+/-0.27 |
| Post heat stress     | 0.78+/-0.13 | 0.61+/-0.02 | 0.67+/-0.04 | 0.31+/-0.07 | 0.85+/-0.04 | 0.74+/-0.06 | 0.64+/-0.05 | 0.92+/-0.02 | 1.01+/-0.07 | 0.26+/-0.01 |
| Starvation           | 1.30+/-0.11 | 2.96+/-0.23 | 1.19+/-0.06 | 0.75+/-0.02 | 0.90+/-0.05 | 0.93+/-0.04 | 0.53+/-0.04 | 1.09+/-0.08 | 1.02+/-0.10 | 0.64+/-0.04 |



**Table S6. Gut EST library statistics.**

| Library ID                                             | TD2a library<br>ID0AFF                                                             | TD2b library<br>ID0AAG                                                              |
|--------------------------------------------------------|------------------------------------------------------------------------------------|-------------------------------------------------------------------------------------|
| Tissue treatment                                       | Control digestive tract                                                            | Gram – challenged digestive tract                                                   |
|                                                        | 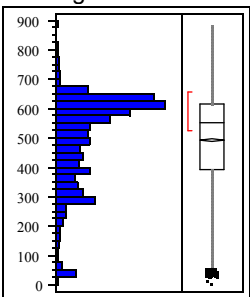 |  |
| Number of clones sequenced                             | 5283                                                                               | 4043                                                                                |
| Mean clone length                                      | 490 ± 160                                                                          | 602 ± 219                                                                           |
| Median clone length                                    | 548                                                                                | 694                                                                                 |
| N seq. < 100 bp                                        | 210                                                                                | 197                                                                                 |
| Clones with no blastX hit ( $E \geq 10$ ) <sup>a</sup> | 737                                                                                | 633                                                                                 |
| % without hit                                          | 14,0%                                                                              | 15,7%                                                                               |
| Clones with blastX hit ( $E < 10$ )                    | 4546 (4065*)                                                                       | 3410 (2921*)                                                                        |
| Clones with non-sign. hits ( $10^{-3} - 10$ )          | 1408                                                                               | 936                                                                                 |
| Clones with sign. hits ( $E \leq 10^{-3}$ )            | 3138                                                                               | 2474                                                                                |
| % with sign. hit                                       | 59,4%                                                                              | 61,2%                                                                               |
| Uniprot hits from blastX (total)                       | 2192                                                                               | 806                                                                                 |
| Uniprot hits from blastX (significant)                 | 1486                                                                               | 578                                                                                 |
| N hits with more than 10 clones                        | 56                                                                                 | 50                                                                                  |
| N hits with more than 1% expression                    | 6                                                                                  | 12                                                                                  |
| N hits with more than 2% expression                    | 1                                                                                  | 9                                                                                   |
| Hits with GO annotation (%) <sup>b</sup>               | 79 %                                                                               | 80 %                                                                                |
| Hits without GO annotation (total Fatigo)              | 312 (1495)                                                                         | 117 (579)                                                                           |
| N Contigs (Ap v5 clustering)                           | 2128                                                                               | 875                                                                                 |
| redundancy index (% contigs vs clones)                 | 40.3 %                                                                             | 21.6 %                                                                              |
| Nb specific contigs (control vs challenged)            | 1724                                                                               | 471                                                                                 |
| specificity rate (% specific vs total)                 | 81%                                                                                | 54%                                                                                 |
| Fatigo analysis, total genes analysed                  | 1495                                                                               | 579                                                                                 |
| Go class (4th level) <sup>c</sup>                      |                                                                                    |                                                                                     |
| biopolymer metabolism (0.005 – 0.088)                  | 21.0 %                                                                             | 11.3 %                                                                              |
| transport (0.029 – 0.45)                               | 19.1 %                                                                             | 27.1 %                                                                              |
| establishment of localization (0.038 – 0.64)           | 19.2 %                                                                             | 27.0 %                                                                              |
| cellular metabolism                                    | 78.4 %                                                                             | 71.7 %                                                                              |
| cell organization and biogenesis                       | 7.4 %                                                                              | 3.8 %                                                                               |
| primary metabolism                                     | 67.7 %                                                                             | 62.3 %                                                                              |
| macromolecule metabolism                               | 46.9 %                                                                             | 44.0 %                                                                              |
| biosynthesis                                           | 24.3 %                                                                             | 26.4 %                                                                              |
| catabolism                                             | 14.3 %                                                                             | 12.6 %                                                                              |

a : blastX performed through the blast parsing script runblastncbi (courtesy Laurent Duret), on Uniprot DB (May 2005, release UniprotKB 4.0, pbil server pbil.univ-lyon1.fr)

b : FATIGO links to GO ontology (June 2005, UniprotKB release 4.0, [www.fatigo.org](http://www.fatigo.org))

c : beneath % of class are given the *unadjusted* and adjusted (step-down min p) p values for library comparison, as computed by Fatigo (Fisher exact test). For non-discriminant classes (no p given,  $p \geq 10\%$ ), only main classes are listed (>10% representation)

\* : corrected for hit redundancy in blast results (low complexity or modular proteins)

**Table S7. List of selected ESTs from the subtracted library.** Results include the highest homologous match for each EST against the *A. pisum* NCBI refseq set (blastX), the publicly available *A. Pisum* ESTs (blastN), and the SwissProt databases (blastX). ESTs have been selected according to either apparent differential gene expression or to their similarities to putative immune-related genes. Differential expression status of ESTs was analyzed using a dot-blot experiment as described in the materials and methods. The change in gene expression after *E. coli* infection relative to the untreated aphid is given as qualitative data (+: overexpression; -: underexpression; =: no differential gene expression). Descriptions for aphid matches are based on *A. pisum* EST cluster descriptions, available at the *Acyrtosiphon Pisum* EST Database [142], and/or on refseq descriptions.

| EST               |        | Relative expression | Aphid Hits                    |                              |                             |                                                       | Swiss Prot Hits        |                                 |                                            |
|-------------------|--------|---------------------|-------------------------------|------------------------------|-----------------------------|-------------------------------------------------------|------------------------|---------------------------------|--------------------------------------------|
| GenBank Acc. Num. | Length |                     | <i>A. pisum</i> gene (evalue) | <i>A. pisum</i> EST (evalue) | <i>A. pisum</i> EST cluster | Description based on gene or EST                      | Swiss Prot ID (evalue) | Organism                        | Description                                |
| GD186025          | 237    | -                   | no hit                        | EX619631 (e-104)             | APG20589                    |                                                       | no hit                 |                                 |                                            |
| GD186052          | 629    | -                   | ACYPI006141 (5e-31)           | FF333609 (0.0)               | APG03947                    | similar to eukaryotic translation initiation factor 5 | Q9VXK6 (9e-26)         | <i>Drosophila melanogaster</i>  | eukaryotic translation initiation factor 5 |
| GD186090          | 299    | -                   | ACYPI004024 (3e-11)           | FF338507 (e-106)             | APG01676                    | transport, small GTPase mediated signal transduction  | Q9VZ23 (2e-07)         | <i>Drosophila melanogaster</i>  | GTP-binding nuclear protein Ran            |
| GD186102          | 425    | -                   | no hit                        | DY224167                     | APD07979                    |                                                       | no hit                 |                                 |                                            |
| GD185918          | 445    | +                   | no hit                        | FF317856                     | APG05151                    |                                                       | no hit                 |                                 |                                            |
| GD185990          | 539    | +                   | ACYPI005949 (5e-99)           | FF334362 (0.0)               | APG08004                    | Rps3 ribosomal protein S3                             | P48153 (2e-81)         | <i>Manduca sexta</i>            | 40S ribosomal protein S3                   |
| GD186053          | 320    | +                   | ACYPI006749 (8e-34)           | EX620733 (e-169)             | APG08261                    | methionine biosynthesis                               | no hit                 |                                 |                                            |
| GD186057          | 748    | +                   | ACYPI006004 (2e-189)          | FF324610 (0.0)               | APG11294                    | similar to latent nuclear antigen                     | Q8IMP6 (7e-23)         | <i>Drosophila melanogaster</i>  | protein SPT2 homolog                       |
| GD186146          | 540    | +                   | ACYPI003334 (6e-62)           | EX607065 (0.0)               | APG09767                    |                                                       | Q6GMF8 (5e-46)         | <i>Danio rerio</i>              | rhomboïd family member 1                   |
| GD186208          | 397    | +                   | no hit                        | FF317879 (0.0)               | APG01972                    | nuclear mRNA splicing                                 | no hit                 |                                 |                                            |
| GD186213          | 399    | +                   | no hit                        | EX653226 (e-113)             | APG17996                    |                                                       | no hit                 |                                 |                                            |
| GD186220          | 314    | +                   | ACYPI000343 (8e-59)           | CN762809 (e-155)             | APD04091                    | similar to ubiquitin specific protease 7              | Q9VYQ8 (5e-17)         | <i>Drosophila melanogaster</i>  | ubiquitin carboxyl-terminal hydrolase 7    |
| GD186223          | 571    | +                   | ACYPI007035 (4e-85)           | FF317872 (0.0)               | APG06079                    | similar to coiled-coil domain-containing protein 132  | Q8CI71 (1e-19)         | <i>Mus musculus</i>             | coiled-coil domain-containing protein 132  |
| GD186225          | 333    | +                   | no hit                        | no hit                       |                             |                                                       | no hit                 |                                 |                                            |
| GD186231          | 379    | +                   | ACYPI003578 (2e-58)           | FF314239 (0.0)               | APG03794                    | similar to signal recognition particle 72 kDa protein | P33731 (7e-15)         | <i>Canis lupus familiaris</i>   | signal recognition particle 72 kDa protein |
| GD186337          | 674    | +                   | no hit                        | FF333448 (e-115)             | APG13156                    | amino acid transport                                  | Q54S12 (0.12)          | <i>Dictyostelium discoideum</i> | transmembrane protein 104 homolog          |
| GD186362          | 397    | +                   | no hit                        | DY223529 (e-103)             | APD03776                    |                                                       | no hit                 |                                 |                                            |
| GD186383          | 375    | +                   | no hit                        | FF305066 (0.0)               | APG03552                    | protein amino acid phosphorylation                    | Q16513 (0.003)         | <i>Homo sapiens</i>             | serine/threonine-protein kinase N2         |
| GD186386          | 361    | +                   | no hit                        | FF330011                     | APG09318                    |                                                       | no hit                 |                                 |                                            |

| EST               |        |                     | Aphid Hits                    |                              |                             |                                                               | Swiss Prot Hits        |                                |                                                                |
|-------------------|--------|---------------------|-------------------------------|------------------------------|-----------------------------|---------------------------------------------------------------|------------------------|--------------------------------|----------------------------------------------------------------|
| GenBank Acc. Num. | Length | Relative expression | <i>A. pisum</i> gene (evalue) | <i>A. pisum</i> EST (evalue) | <i>A. pisum</i> EST cluster | Description based on gene or EST                              | Swiss Prot ID (evalue) | Organism                       | Description                                                    |
| GD185976          | 283    | =                   | ACYPI002027 (2e-58)           | CV838512 (e-115)             | APD02867                    | thrombospondin-like                                           | Q9C014 (1e-16)         | <i>Homo sapiens</i>            | thrombospondin type-1 domain-containing protein 7B             |
| GD186047          | 347    | =                   | ACYPI000111 (1e-68)           | no hit                       |                             | similar to adam                                               | Q9VAC5 (2e-53)         | <i>Drosophila melanogaster</i> | Adam 17-like protease                                          |
| GD186063          | 1130   | =                   | ACYPI000719 (3e-136)          | FF336689 (0.0)               | APG09006                    |                                                               | P13284 (7e-13)         | <i>Homo sapiens</i>            | gamma-interferon-inducible lysosomal thiol reductase precursor |
| GD186100          | 284    | =                   | ACYPI008118 (4e-102)          | FF315088 (0.0)               | APG16211                    | similar to tyrosine protein kinase                            | Q24592 (2e-08)         | <i>Drosophila melanogaster</i> | tyrosine-protein kinase hopscotch (Jak)                        |
| GD186119          | 325    | =                   | ACYPI005016 (2e-51)           | FF320908 (e-176)             | APG08844                    | serine protease inhibitor (serpin 1)                          | P48594 (2e-17)         | <i>Homo sapiens</i>            | serpin B4                                                      |
| GD186120          | 353    | =                   | ACYPI005540 (6e-63)           | CN759023 (0.0)               | APD04504                    | MAPKKK cascade                                                | Q5E9X2 (3e-45)         | <i>Bos taurus</i>              | dual specificity mitogen-activated protein kinase 6            |
| GD186131          | 517    | =                   | ACYPI005016 (5e-86)           | FF336182 (0.0)               | APG07692                    | serine-protease inhibitor (serpin 1)                          | P48594 (2e-17)         | <i>Homo sapiens</i>            | serpin B4                                                      |
| GD186142          | 328    | =                   | no hit                        | EX639251 (e-110)             | APG19100                    | receptor activity                                             | Q5XIN3 (1e-07)         | <i>Rattus norvegicus</i>       | TRAF3-interacting protein 1                                    |
| GD186162          | 330    | =                   | ACYPI003236 (3e-59)           | no hit                       |                             | similar to sunday driver                                      | Q9ESN9 (9e-34)         | <i>Mus musculus</i>            | JNK-interacting protein 3                                      |
| GD186173          | 245    | =                   | no hit                        | CN761251 (e-119)             | APD04293                    | programs cell death                                           | Q3UU35 (0.8)           | <i>Mus musculus</i>            | Ovostatin homolog                                              |
| GD186257          | 345    | =                   | ACYPI006651 (7e-32)           | CN764436 (e-163)             | APD05533                    | similar to membrane-associated LPS-inducible TNF alpha factor | Q8QGW7 (7e-10)         | <i>Gallus gallus</i>           | LPS-induced TNF-alpha factor homolog                           |
| GD186266          | 346    | =                   | ACYPI002465 (3e-28)           | CN756373 (e-173)             | APD05909                    | similar to macrophage migration inhibitory factor             | P91850 (3e-08)         | <i>Brugia malayi</i>           | Macrophage migration inhibitory factor homolog                 |
| GD186363          | 268    | =                   | no hit                        | EX650498 (e-126)             | APG05258                    | sugar binding                                                 | no hit                 |                                |                                                                |

**Figure S1. Maximum likelihood phylogenies of selected immune gene families. (a)** Gram-negative binding proteins; (b) Spätzles; (c) Tolls, note that there is no support for *A. pisum* tolls clading with *D. melanogaster* Tehao; (d) Lysozymes; (e) Teps; (f) Prophenoloxidases; and, (g) low molecular weight heat shock proteins (Hsp83, Hsp90 not included). \* represents approximate likelihood ratio test (aLRT) support > 80. (Aga: *Anopheles gambiae*; Ame: *Apis Mellifera*; Api: *Acythrosiphon pisum*; Bom: *Bombyx mori*; Cel: *Caenorhabditis elegans*; Cin: *Ciona intestinalis*; Dme = *Drosophila melanogaster*. Dpu = *Daphnia pulex*; Nvi: *Nasonia vitripennis*; Phu: *Pediculus humanus*; Tca: *Tribolium castaneum*.)

(a)

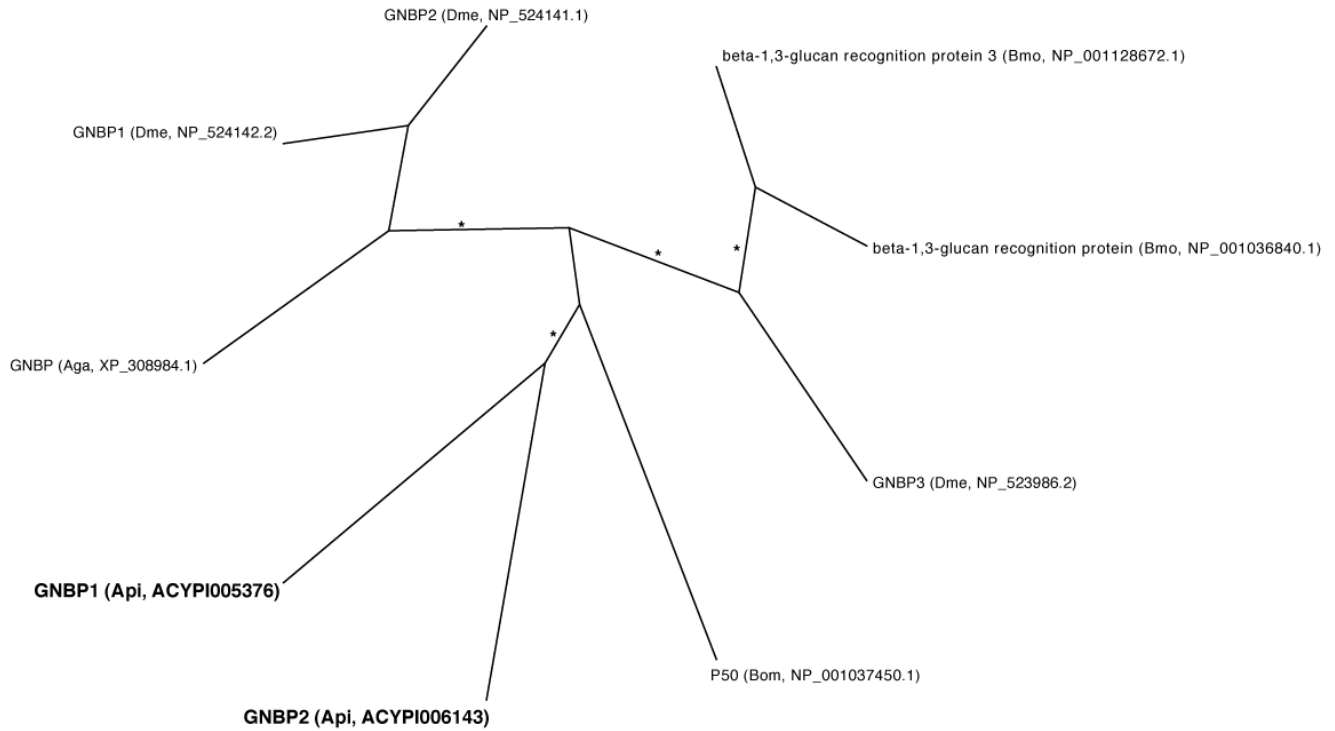

(b)

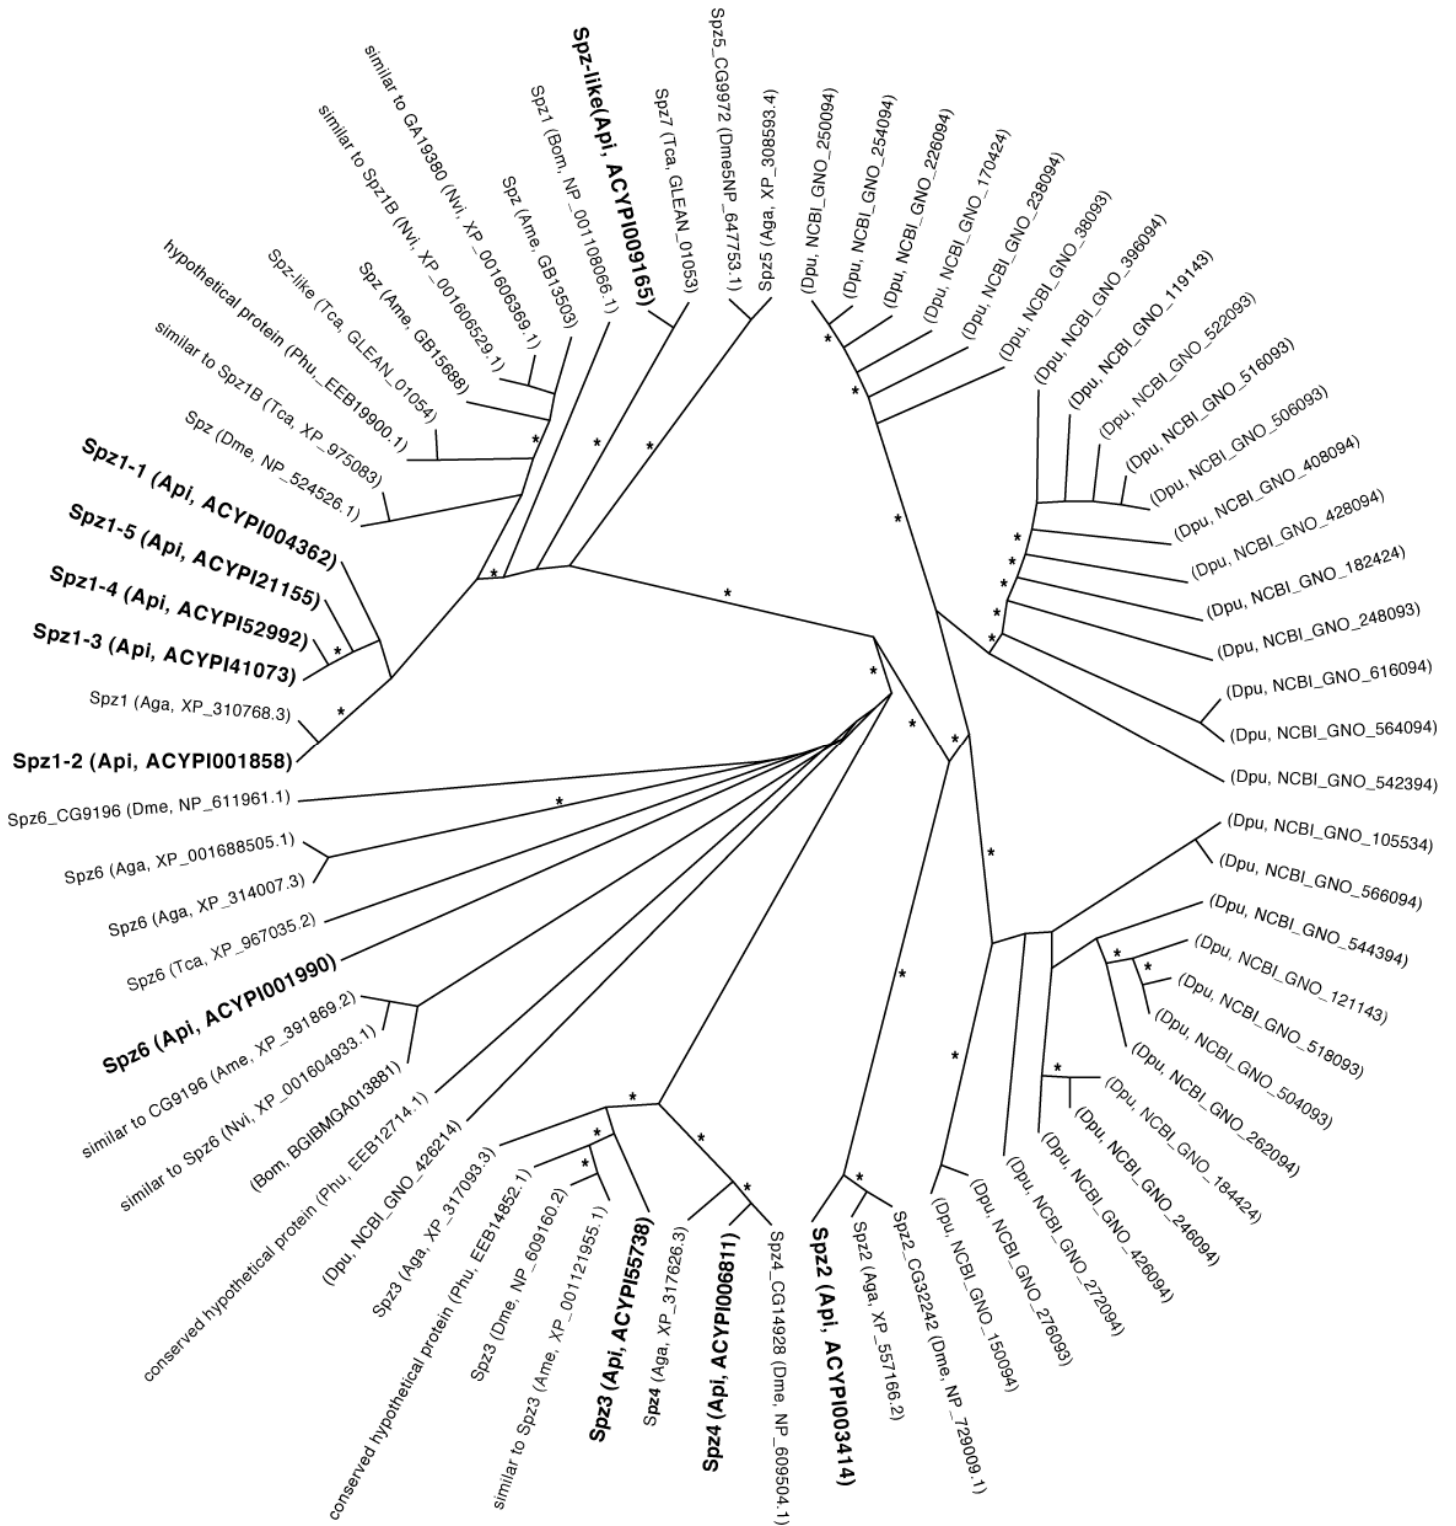





(e)

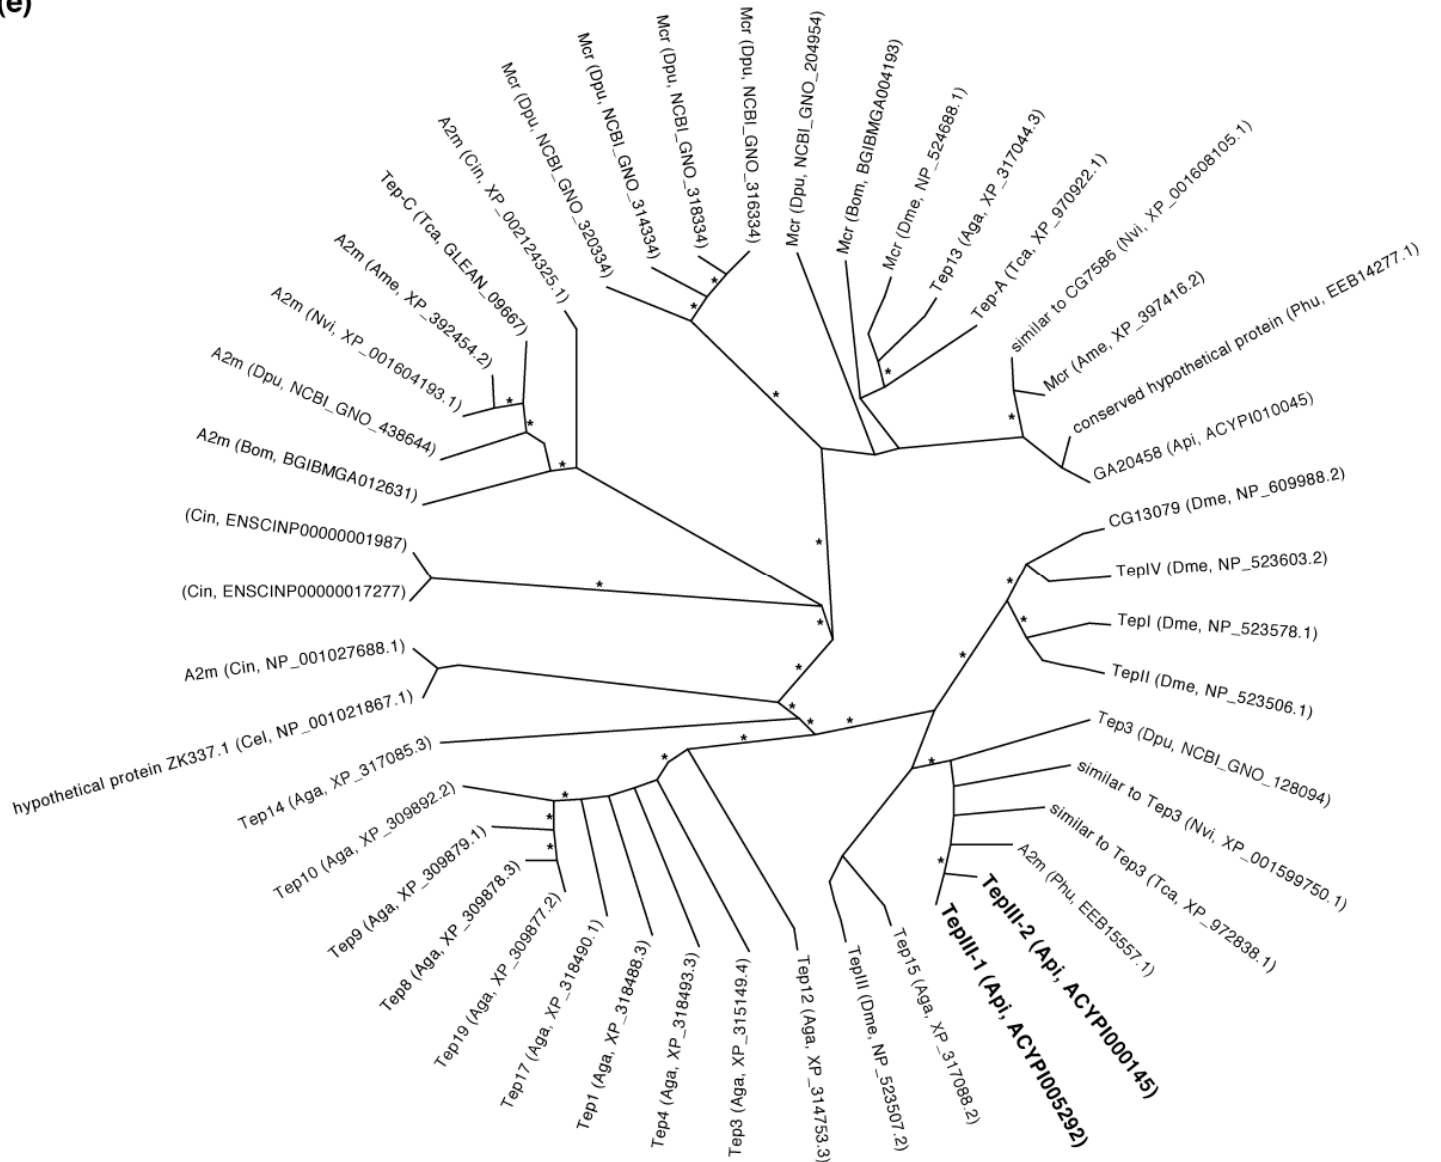



(f)

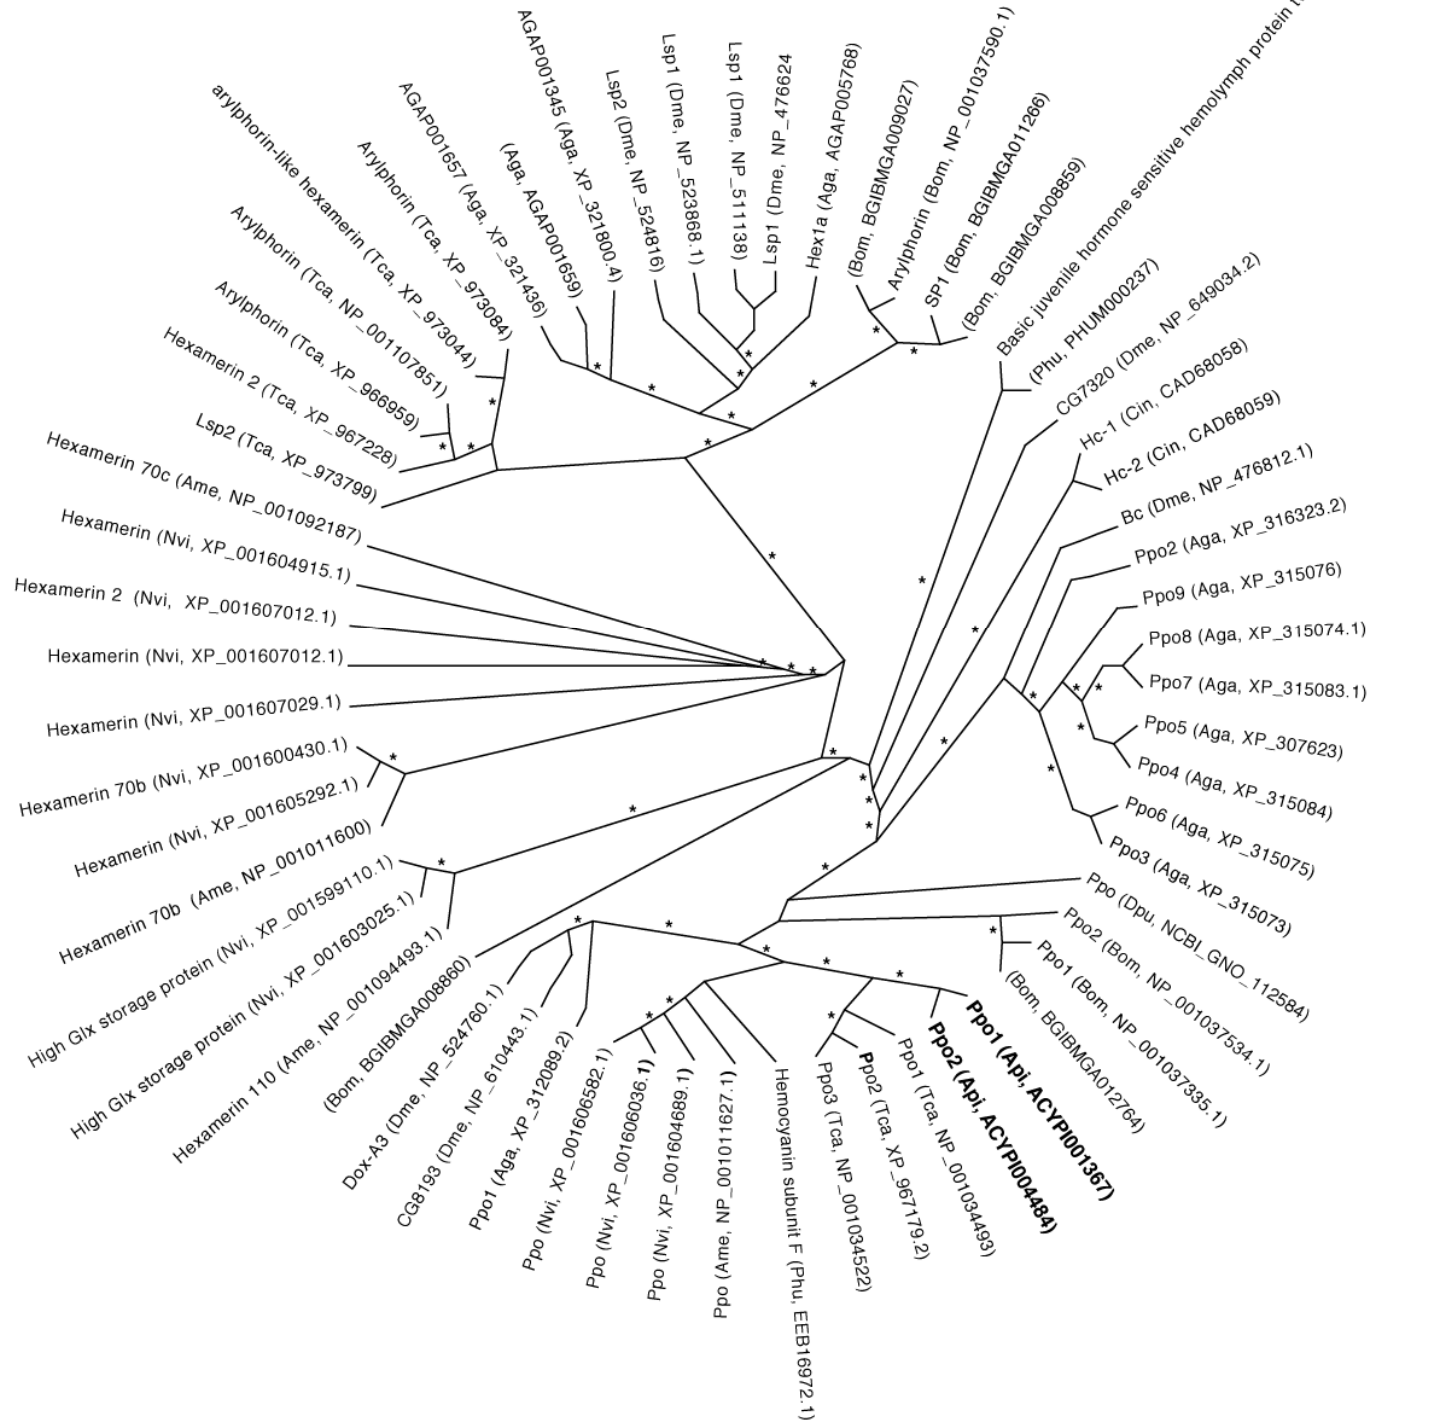

(g)

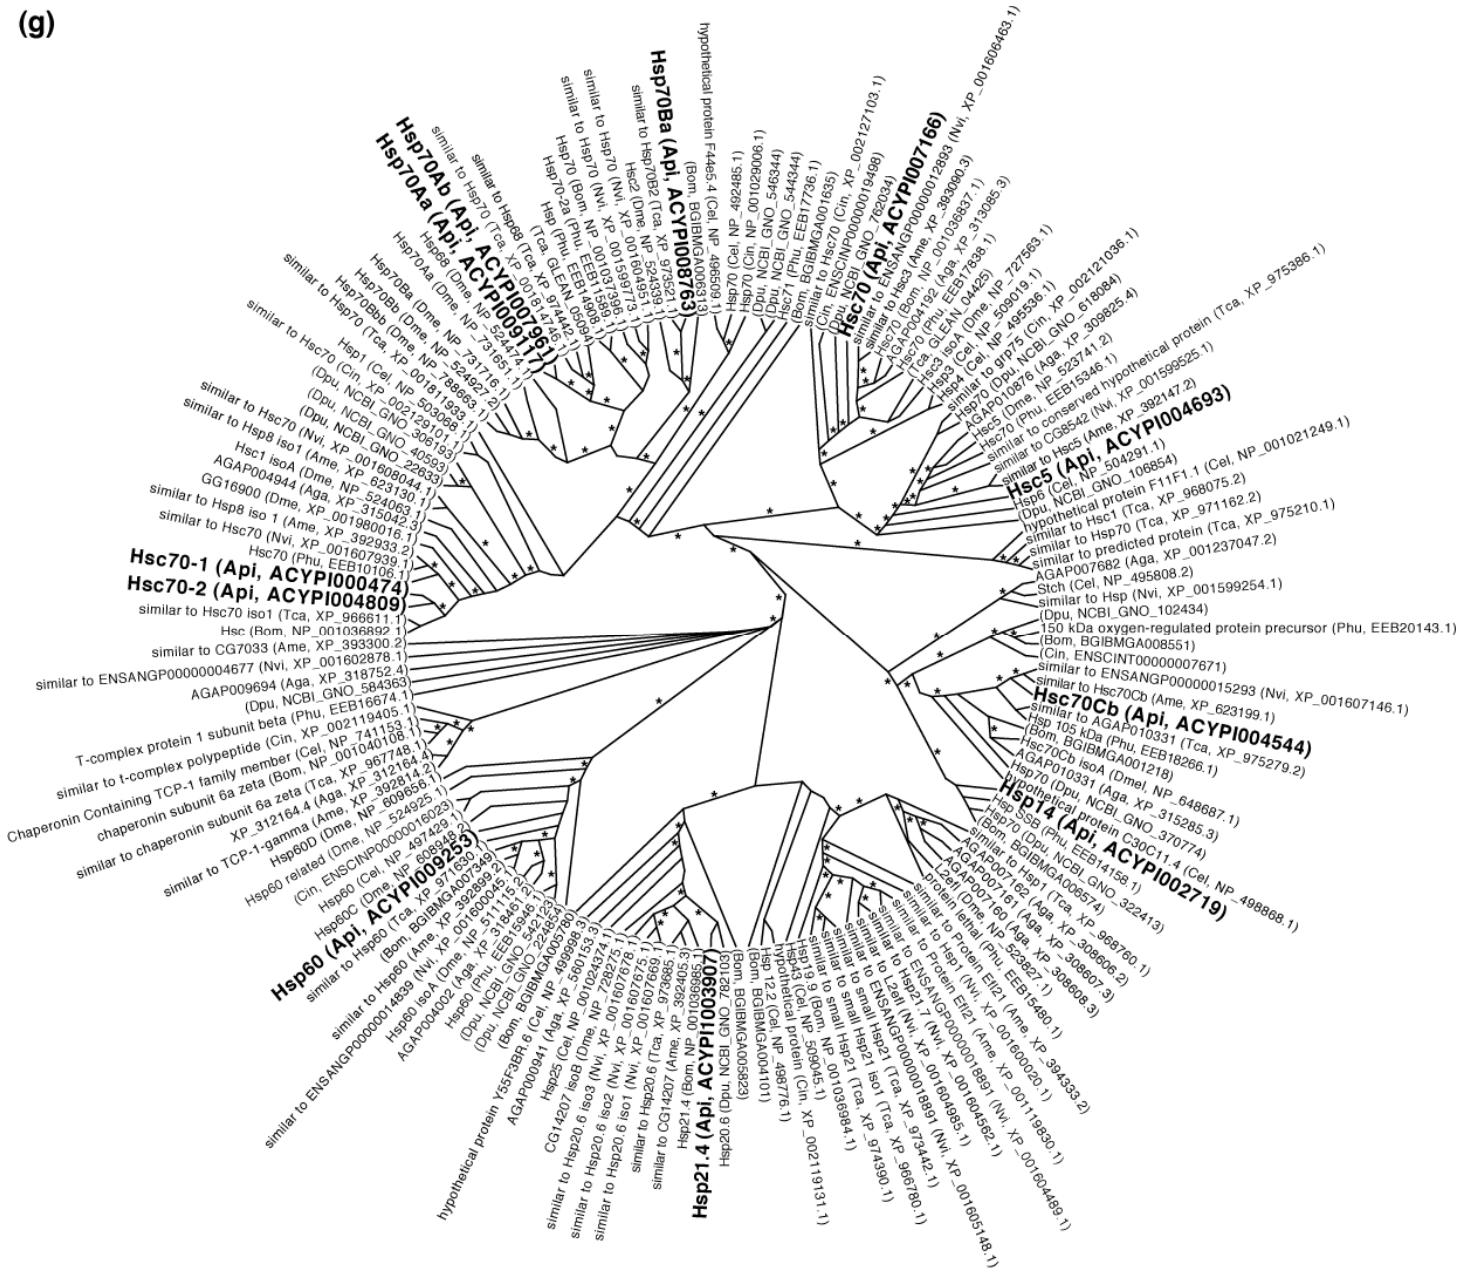

**Figure S2. Alignments of putative antimicrobial peptides megourin and penaeidin.** (a) Putative pea aphid megourin (pea\_aphid) aligned with 3 megourins of the aphid *Megoura viciae* (MEGVI). (b) Putative pea aphid penaeidin (ACYPI37769-PA) aligned with penaeidins from the shrimp *Penaeus vannamei* (PENVA) and *Penaeus (Litopenaeus) setiferus* (LITS).

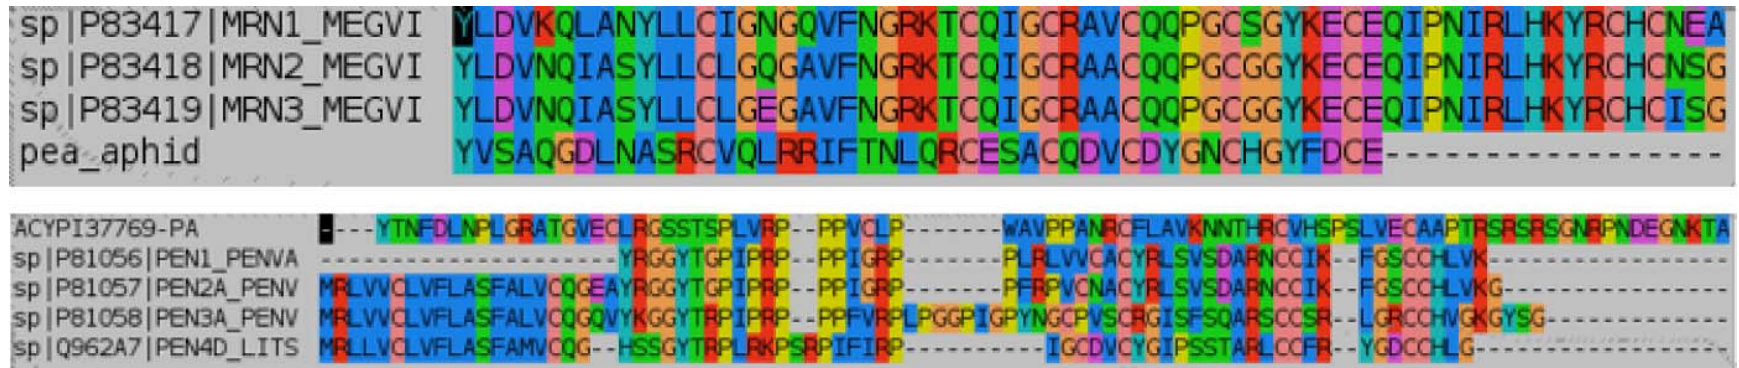

**Figure S3. Survival curves for experimental infections associated with the qPCR study.** (a) In the bacterial feeding experiment, 30 aphids per condition were fed for 20hrs on artificial diet containing bacteria or on control diet and then transferred to plants and monitored for survival. Though survival data for the bacterial stabbing experiment, in which aphids were stabbed with bacteria-contaminated needles, was not collected daily, after two days, overall survival was similar to the feeding trials, with 100% survival of control aphids, 80% survival of *E. coli*-stabbed aphids, 30% survival of Gram-positive pathogen-stabbed aphids, and 0% survival of Gram-negative pathogen-stabbed aphids (n = 10 per condition). (b) In the fungal shower experiment, 22 aphids were exposed to a shower of fungal spores for two hours and then transferred to plants. Control aphids were not exposed. (c) In the viral stabbing experiment, 20 aphids were stabbed with a virus-contaminated needle and then transferred to plants. Control aphids were not stabbed.

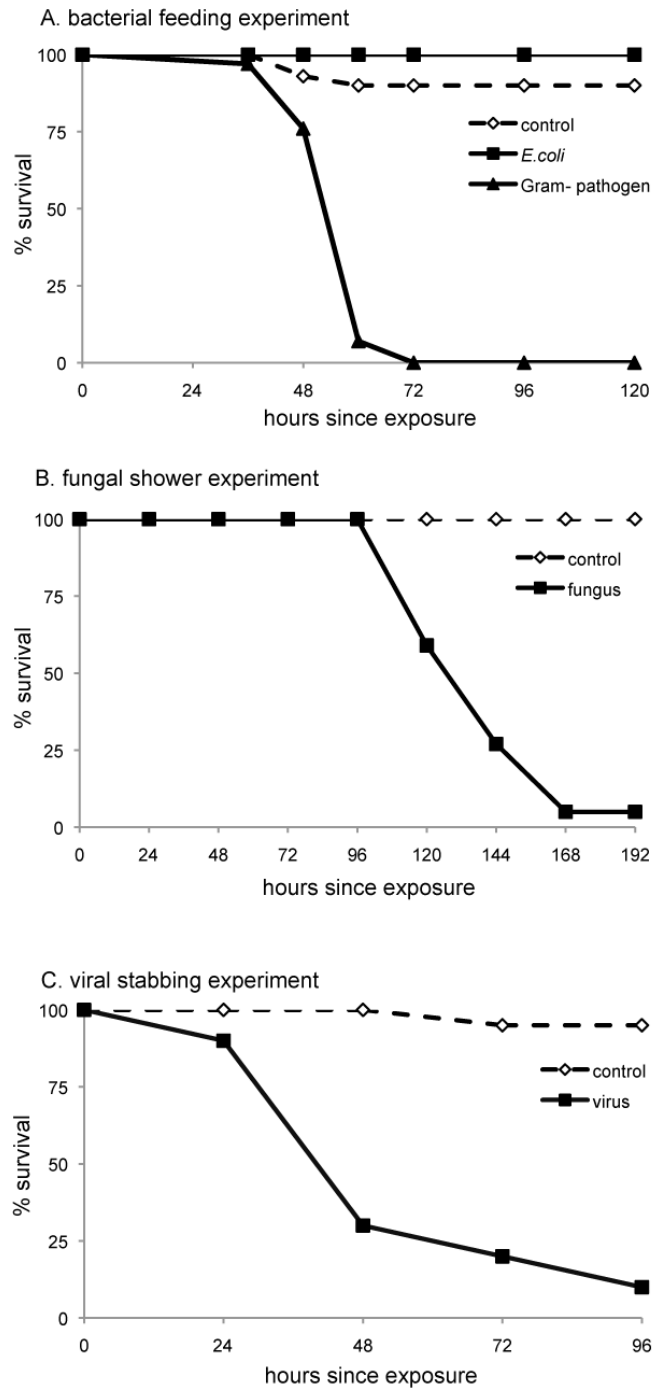

Supplement: gb-2010-11-2-r21-S1.pdf [file gb-2010-11-2-r21-S1.pdf]
